# Supplementary material
Source: MDPI journal article supplement (https://www.mdpi.com/2624-8549/4/2/37)
Supplement: s1 [file s1]

## Supporting Information

|                                                                                                                                                                       |       |
|-----------------------------------------------------------------------------------------------------------------------------------------------------------------------|-------|
| <b>Figure S1.</b> X-ray powder diffractogram of H <sub>5</sub> A at room temperature.                                                                                 | 1     |
| <b>Figure S2.</b> <sup>1</sup> H NMR spectrum of dap·HCl in (CD <sub>3</sub> ) <sub>2</sub> SO at 298 K.                                                              | 2     |
| <b>Figures S3-S4.</b> <sup>1</sup> H NMR spectrum of dap·HCl in (CD <sub>3</sub> ) <sub>2</sub> SO at 298 K (expanded regions).                                       | 3-4   |
| <b>Figure S5.</b> <sup>1</sup> H NMR spectrum of H <sub>5</sub> A in (CD <sub>3</sub> ) <sub>2</sub> SO at 298 K.                                                     | 5     |
| <b>Figure S6.</b> <sup>1</sup> H NMR spectrum of H <sub>5</sub> A in (CD <sub>3</sub> ) <sub>2</sub> SO at 298 K (expanded region).                                   | 6     |
| <b>Figure S7.</b> <sup>1</sup> H NMR spectrum of H <sub>3</sub> L in C <sub>6</sub> D <sub>6</sub> at 298 K.                                                          | 7     |
| <b>Figure S8.</b> <sup>1</sup> H NMR spectrum of H <sub>3</sub> L in C <sub>6</sub> D <sub>6</sub> at 298 K (expanded region).                                        | 8     |
| <b>Figure S9.</b> <sup>13</sup> C NMR spectrum of H <sub>3</sub> L in C <sub>6</sub> D <sub>6</sub> at 298 K.                                                         | 9     |
| <b>Figure S10.</b> <sup>1</sup> H NMR spectrum of crude <b>1</b> in C <sub>6</sub> D <sub>6</sub> at 298 K.                                                           | 10    |
| <b>Figures S11-S12.</b> <sup>1</sup> H NMR spectrum of crude <b>1</b> in C <sub>6</sub> D <sub>6</sub> at 298 K (expanded regions).                                   | 11-12 |
| <b>Figure S13.</b> <sup>1</sup> H NMR spectrum of <b>1</b> ·C <sub>6</sub> H <sub>14</sub> in C <sub>6</sub> D <sub>6</sub> at 298 K.                                 | 13    |
| <b>Figures S14-S15.</b> <sup>1</sup> H NMR spectrum of <b>1</b> ·C <sub>6</sub> H <sub>14</sub> in C <sub>6</sub> D <sub>6</sub> at 298 K (expanded regions).         | 14-15 |
| <b>Figure S16.</b> <sup>13</sup> C NMR spectrum of <b>1</b> ·C <sub>6</sub> H <sub>14</sub> in C <sub>6</sub> D <sub>6</sub> at 298 K.                                | 16    |
| <b>Figure S17.</b> <sup>1</sup> H NMR spectrum of <b>1</b> ·C <sub>6</sub> H <sub>14</sub> in C <sub>6</sub> D <sub>6</sub> at 283 K.                                 | 17    |
| <b>Figures S18-S19.</b> <sup>1</sup> H NMR spectrum of <b>1</b> ·C <sub>6</sub> H <sub>14</sub> in C <sub>6</sub> D <sub>6</sub> at 283 K (expanded regions).         | 18-19 |
| <b>Figure S20.</b> <sup>13</sup> C NMR spectrum of <b>1</b> ·C <sub>6</sub> H <sub>14</sub> in C <sub>6</sub> D <sub>6</sub> at 283 K.                                | 20    |
| <b>Figure S21.</b> <sup>1</sup> H- <sup>1</sup> H COSY spectrum of <b>1</b> ·C <sub>6</sub> H <sub>14</sub> in C <sub>6</sub> D <sub>6</sub> at 283 K.                | 21    |
| <b>Figure S22.</b> <sup>1</sup> H- <sup>13</sup> C HSQCed spectrum of <b>1</b> ·C <sub>6</sub> H <sub>14</sub> in C <sub>6</sub> D <sub>6</sub> at 283 K.             | 22    |
| <b>Figure S23.</b> <sup>1</sup> H- <sup>13</sup> C HMBC spectrum of <b>1</b> ·C <sub>6</sub> H <sub>14</sub> in C <sub>6</sub> D <sub>6</sub> at 283 K.               | 23    |
| <b>Figure S24.</b> <sup>1</sup> H- <sup>1</sup> H ROESY spectrum of <b>1</b> ·C <sub>6</sub> H <sub>14</sub> in C <sub>6</sub> D <sub>6</sub> at 283 K.               | 24    |
| <b>Figure S25.</b> <sup>1</sup> H- <sup>15</sup> N HMBC spectrum of <b>1</b> ·C <sub>6</sub> H <sub>14</sub> in C <sub>6</sub> D <sub>6</sub> at 283 K.               | 25    |
| <b>Figure S26.</b> <sup>1</sup> H NMR spectrum of <b>1</b> ·C <sub>6</sub> H <sub>14</sub> in C <sub>6</sub> D <sub>6</sub> at 310 K.                                 | 26    |
| <b>Figures S27-S28.</b> <sup>1</sup> H NMR spectrum of <b>1</b> ·C <sub>6</sub> H <sub>14</sub> in C <sub>6</sub> D <sub>6</sub> at 310 K (expanded regions).         | 27-28 |
| <b>Figure S29.</b> <sup>7</sup> Li NMR spectrum of <b>1</b> ·C <sub>6</sub> H <sub>14</sub> in C <sub>6</sub> D <sub>6</sub> at three different temperatures.         | 29    |
| <b>Figure S30.</b> <sup>1</sup> H DOSY spectrum of <b>1</b> ·C <sub>6</sub> H <sub>14</sub> in C <sub>6</sub> D <sub>6</sub> at 298 K.                                | 30    |
| <b>Table S1.</b> Crystal data and refinement parameters for β-H <sub>5</sub> A, <b>1</b> ·C <sub>6</sub> H <sub>14</sub> , and <b>2</b> .                             | 31    |
| <b>Table S2.</b> Assignment of <sup>1</sup> H and <sup>13</sup> C NMR signals for <b>1</b> ·C <sub>6</sub> H <sub>14</sub> in C <sub>6</sub> D <sub>6</sub> at 283 K. | 32    |
| <b>Table S3.</b> Impurity NMR signals for <b>1</b> ·C <sub>6</sub> H <sub>14</sub> in C <sub>6</sub> D <sub>6</sub> at 283 K.                                         | 32    |

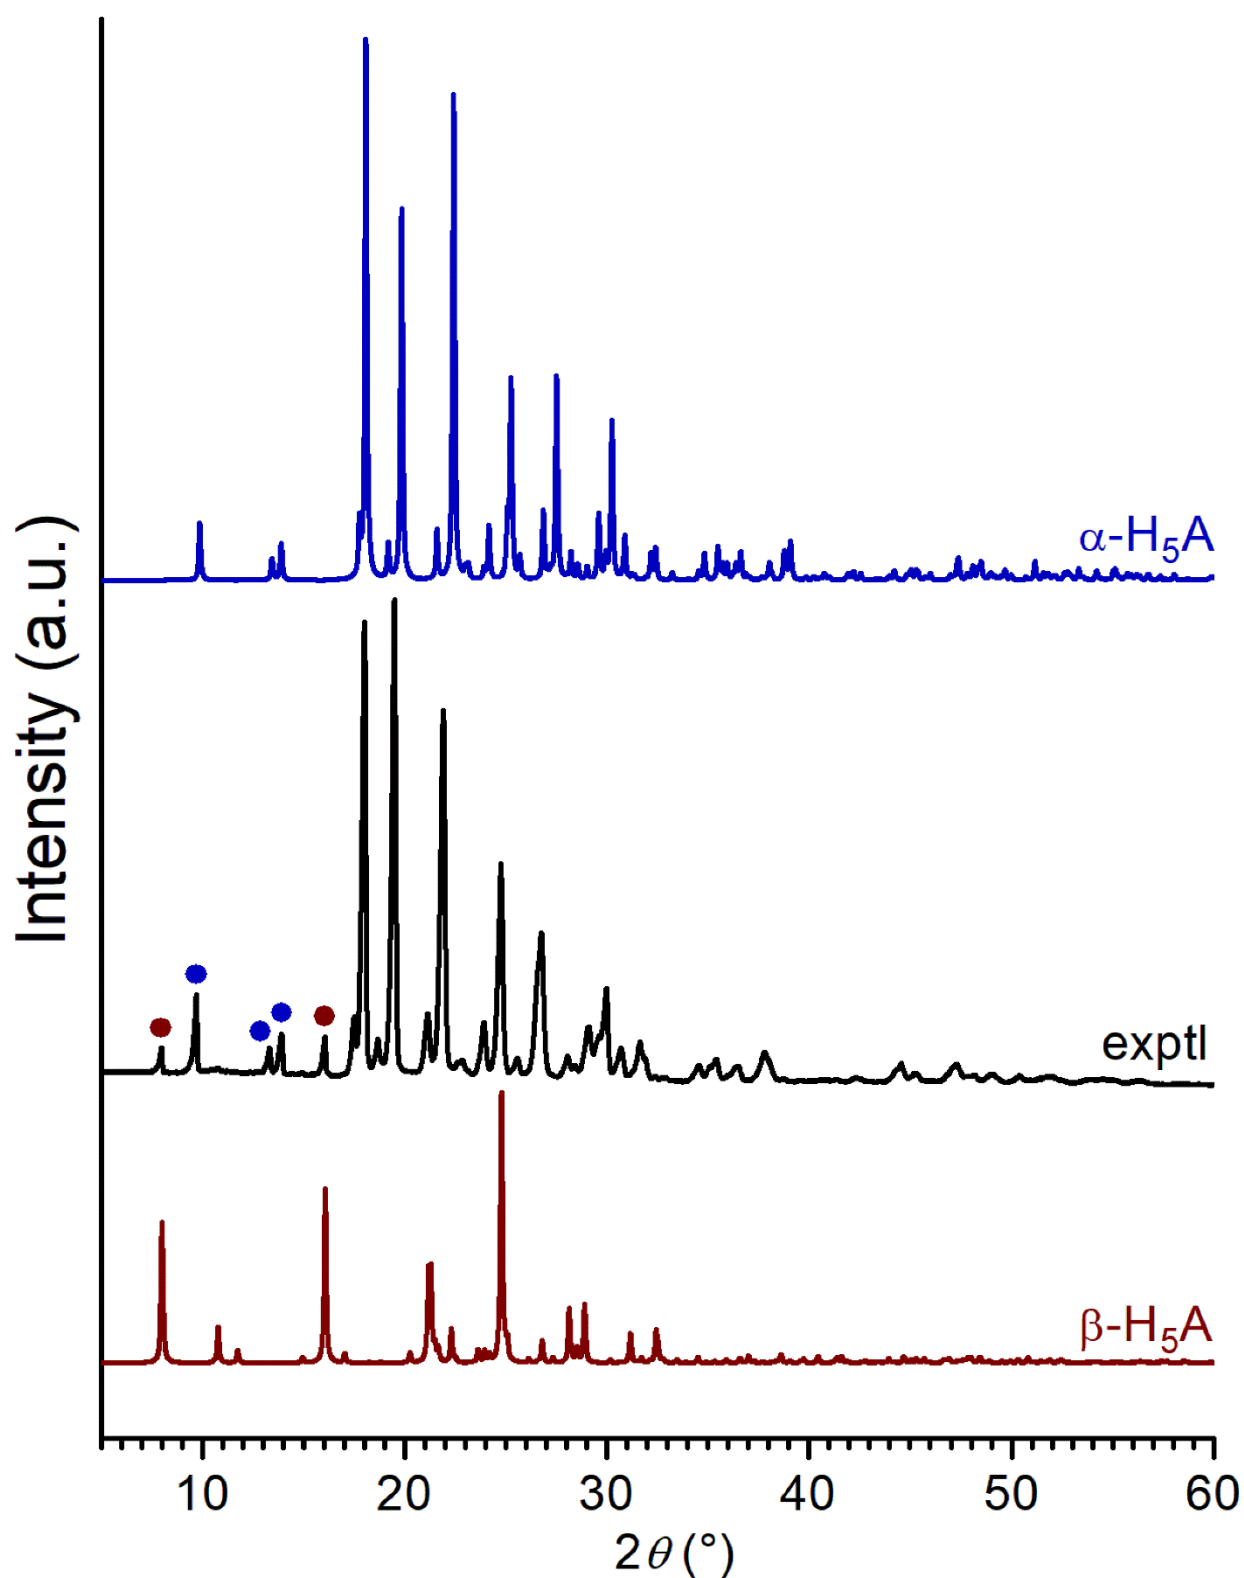

**Figure S1.** X-ray powder diffractogram of  $\text{H}_5\text{A}$  at room temperature. The diffraction patterns for  $\alpha$ - and  $\beta$ - $\text{H}_5\text{A}$ , calculated from single-crystal X-ray data collected at 100 and 298 K, respectively, are also shown for comparison. The high-angle shift of calculated peak positions for  $\alpha\text{-H}_5\text{A}$  is due to low-temperature lattice contraction. The blue and wine dots mark low-angle peaks arising from the two polymorphs.

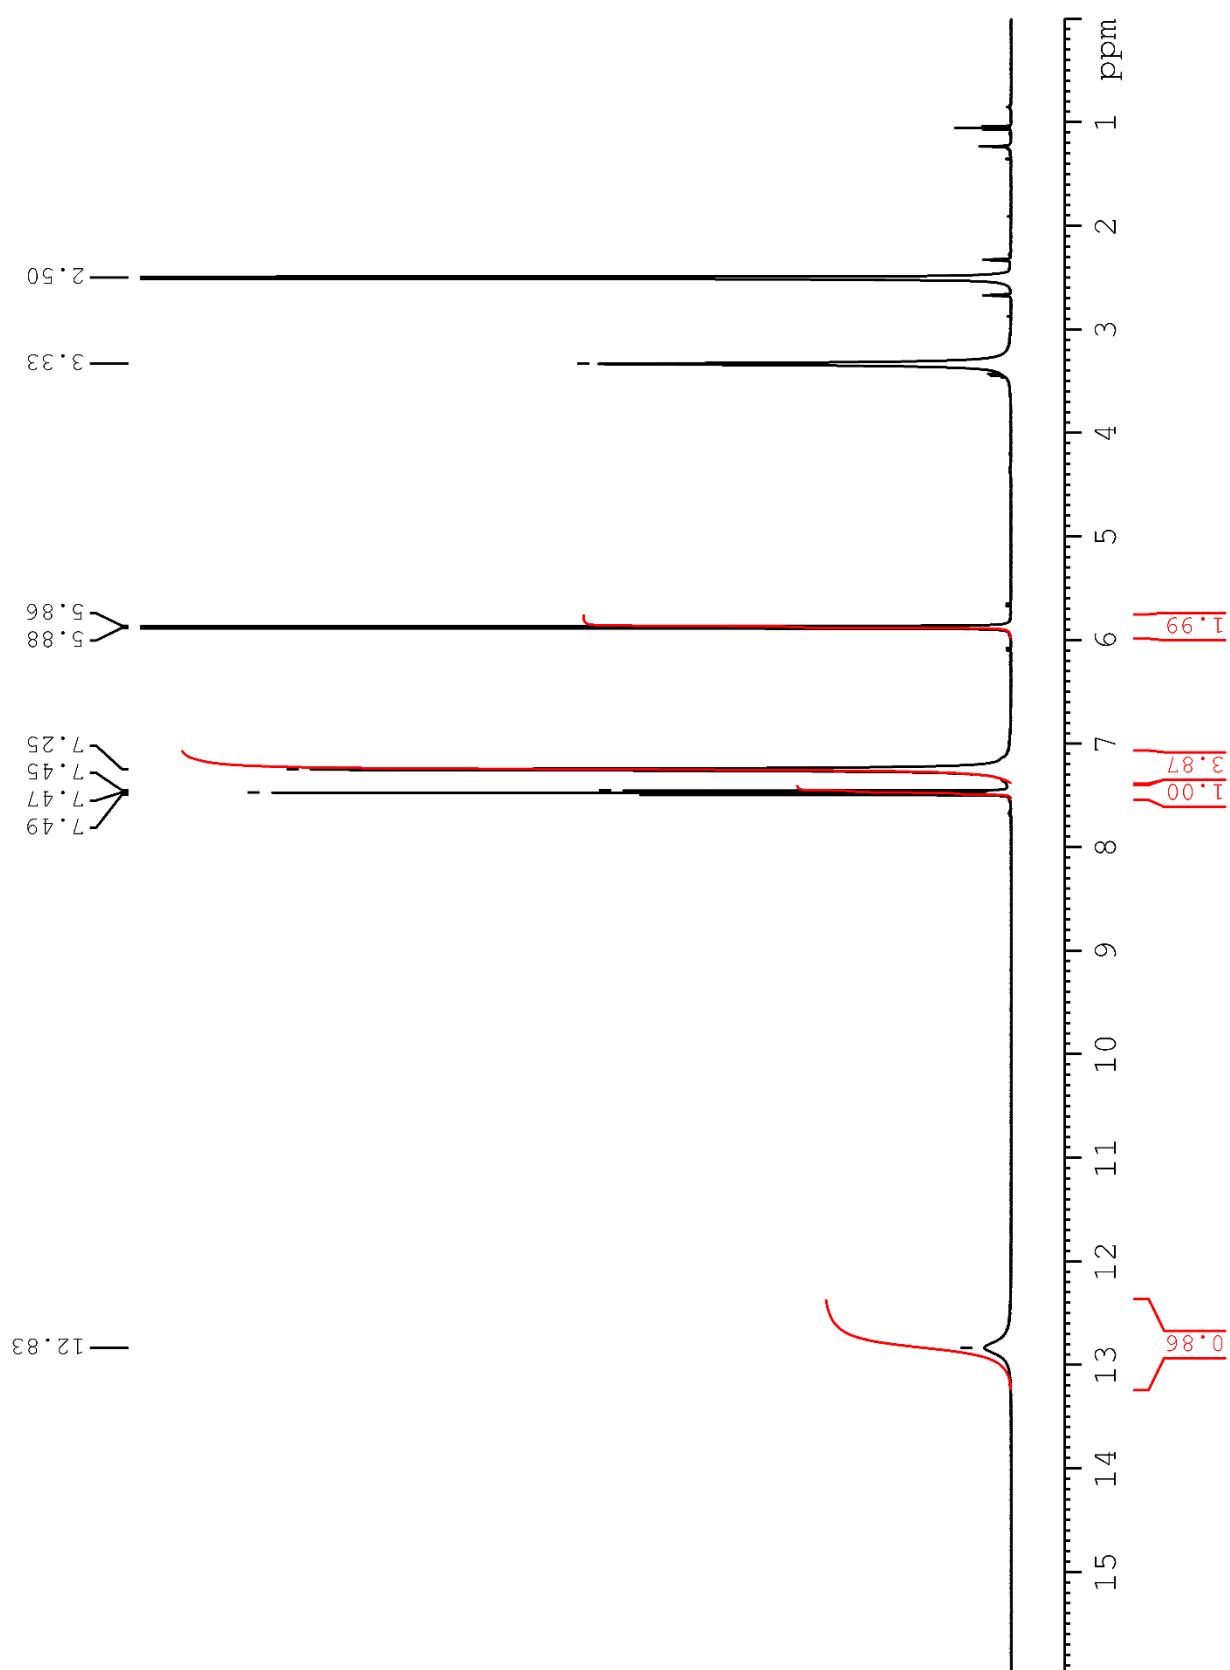

**Figure S2.**  $^1\text{H}$  NMR spectrum of dap·HCl in  $(\text{CD}_3)_2\text{SO}$  (400.13 MHz) at 298 K.

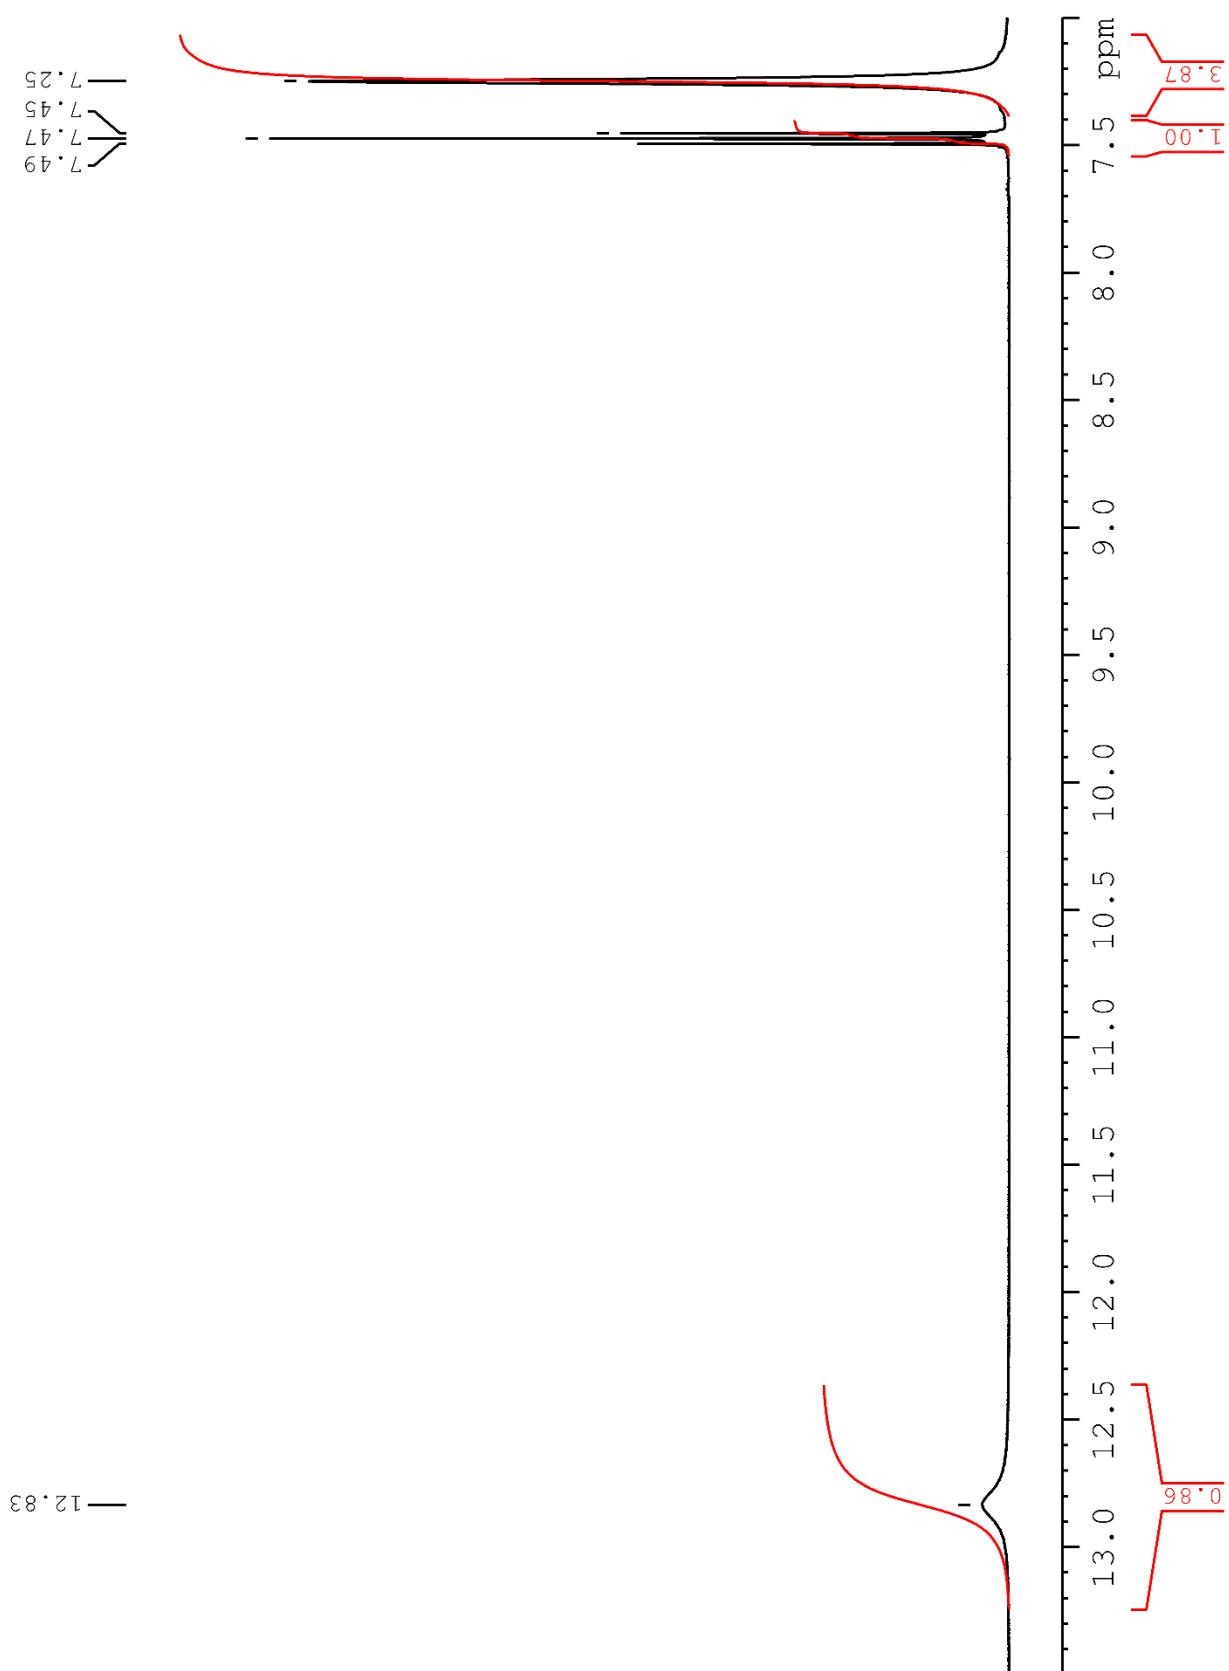

**Figure S3.**  $^1\text{H}$  NMR spectrum of dap·HCl in  $(\text{CD}_3)_2\text{SO}$  (400.13 MHz) at 298 K (expanded region).

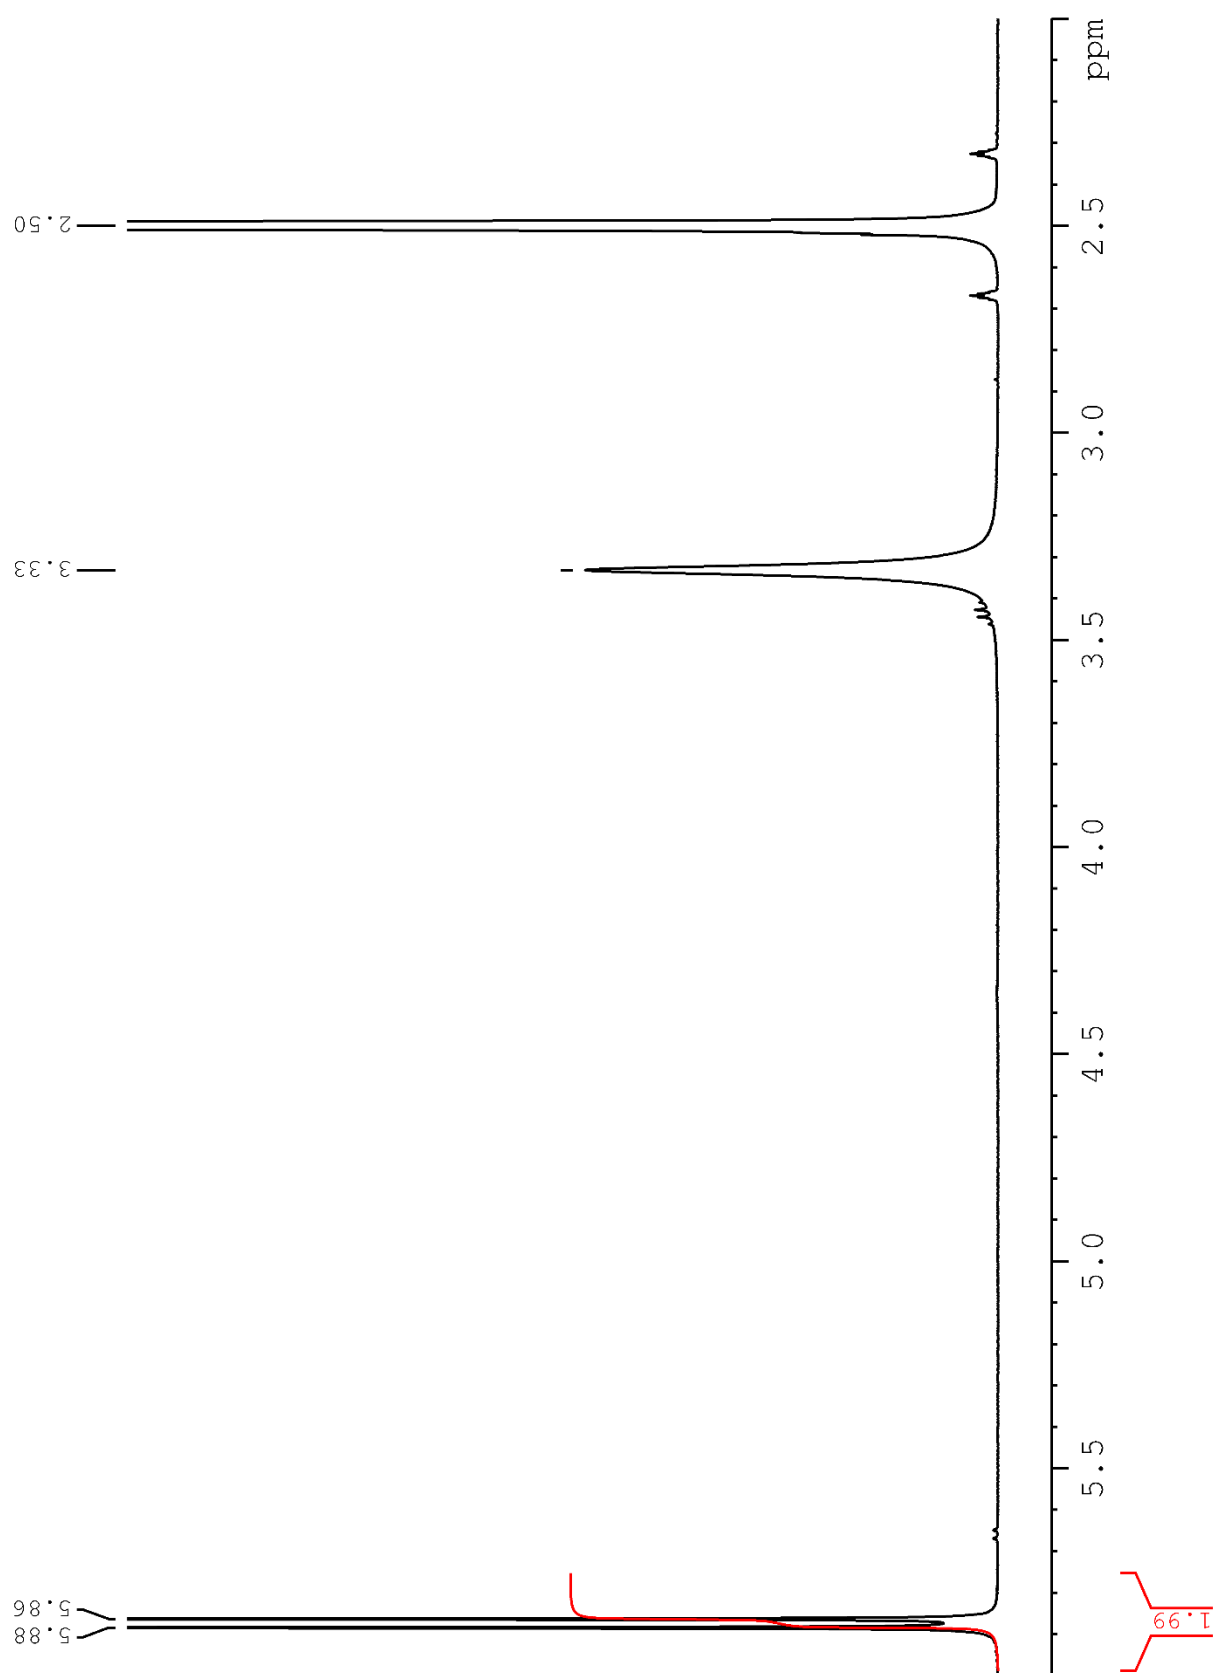

**Figure S4.**  $^1\text{H}$  NMR spectrum of dap·HCl in  $(\text{CD}_3)_2\text{SO}$  (400.13 MHz) at 298 K (expanded region).

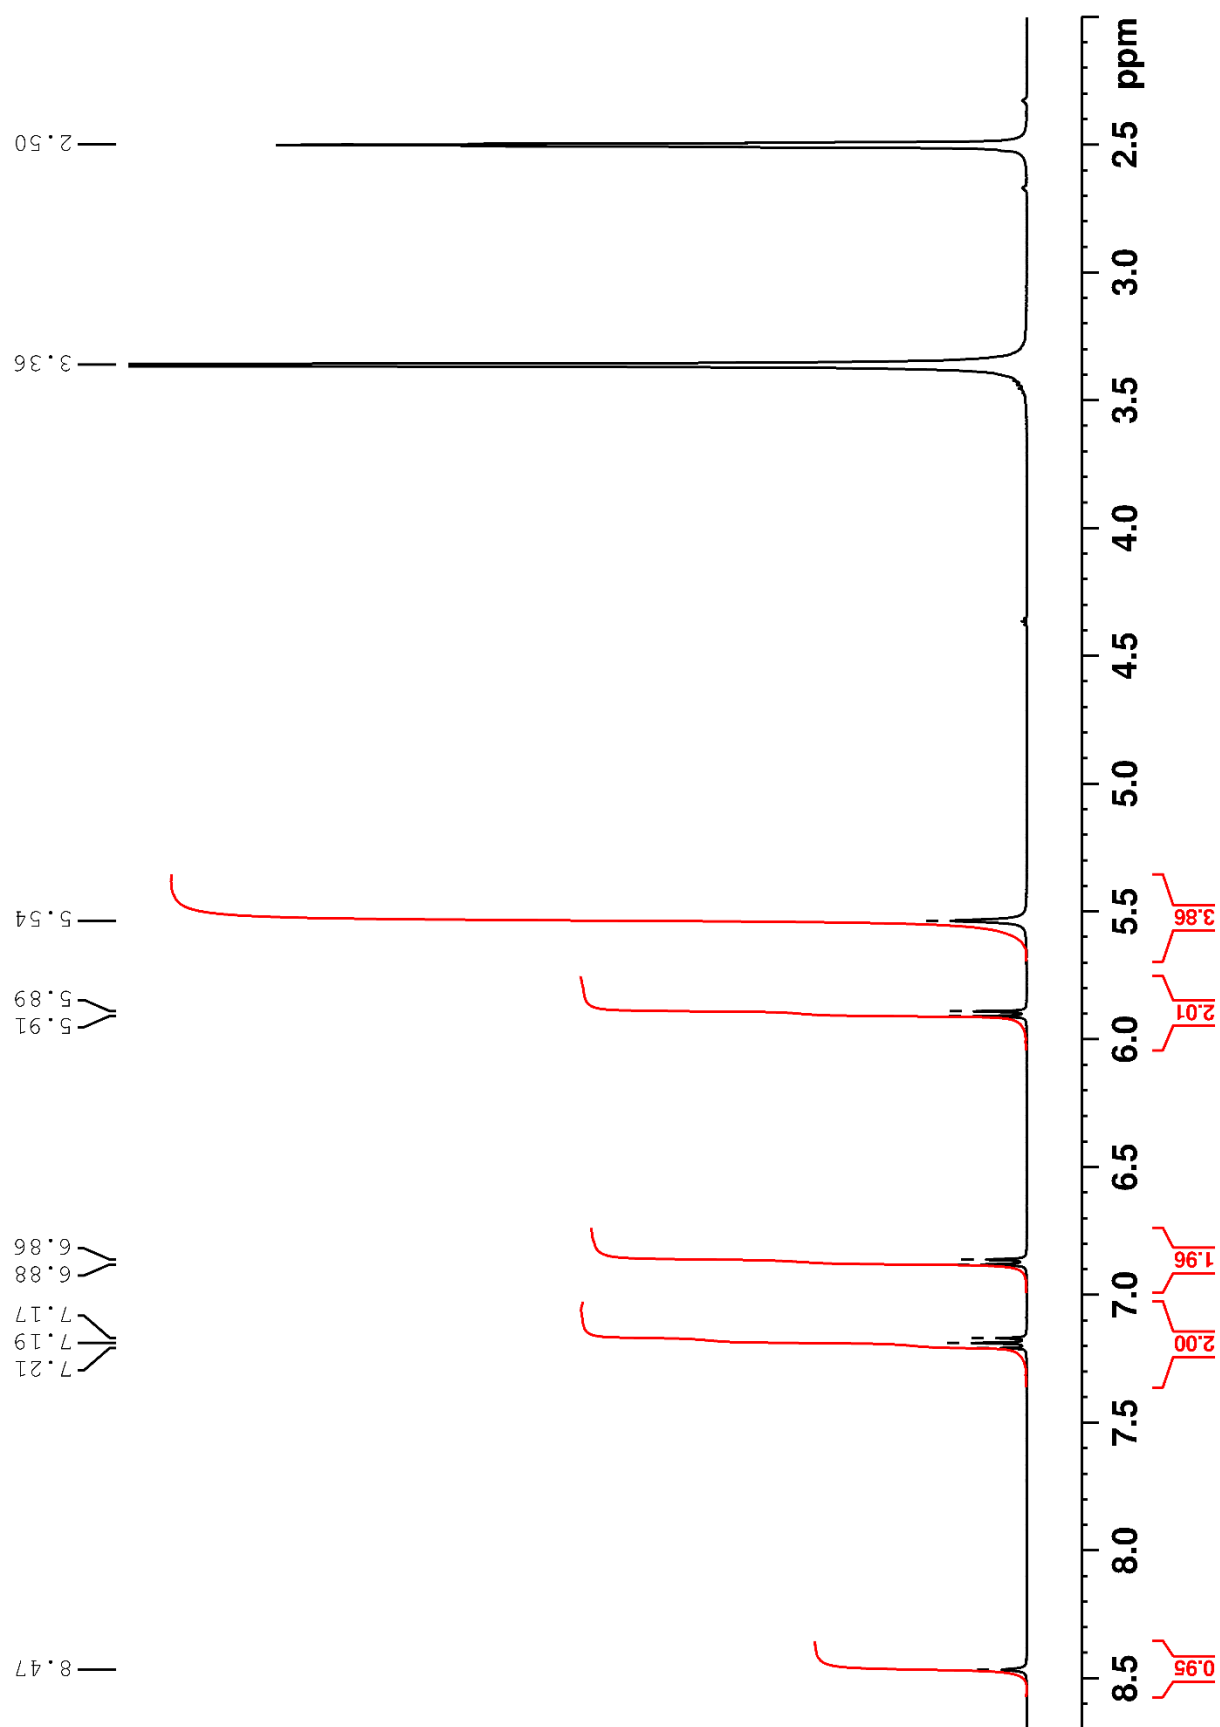

**Figure S5.** <sup>1</sup>H NMR spectrum of H<sub>5</sub>A in (CD<sub>3</sub>)<sub>2</sub>SO (400.13 MHz) at 298 K.

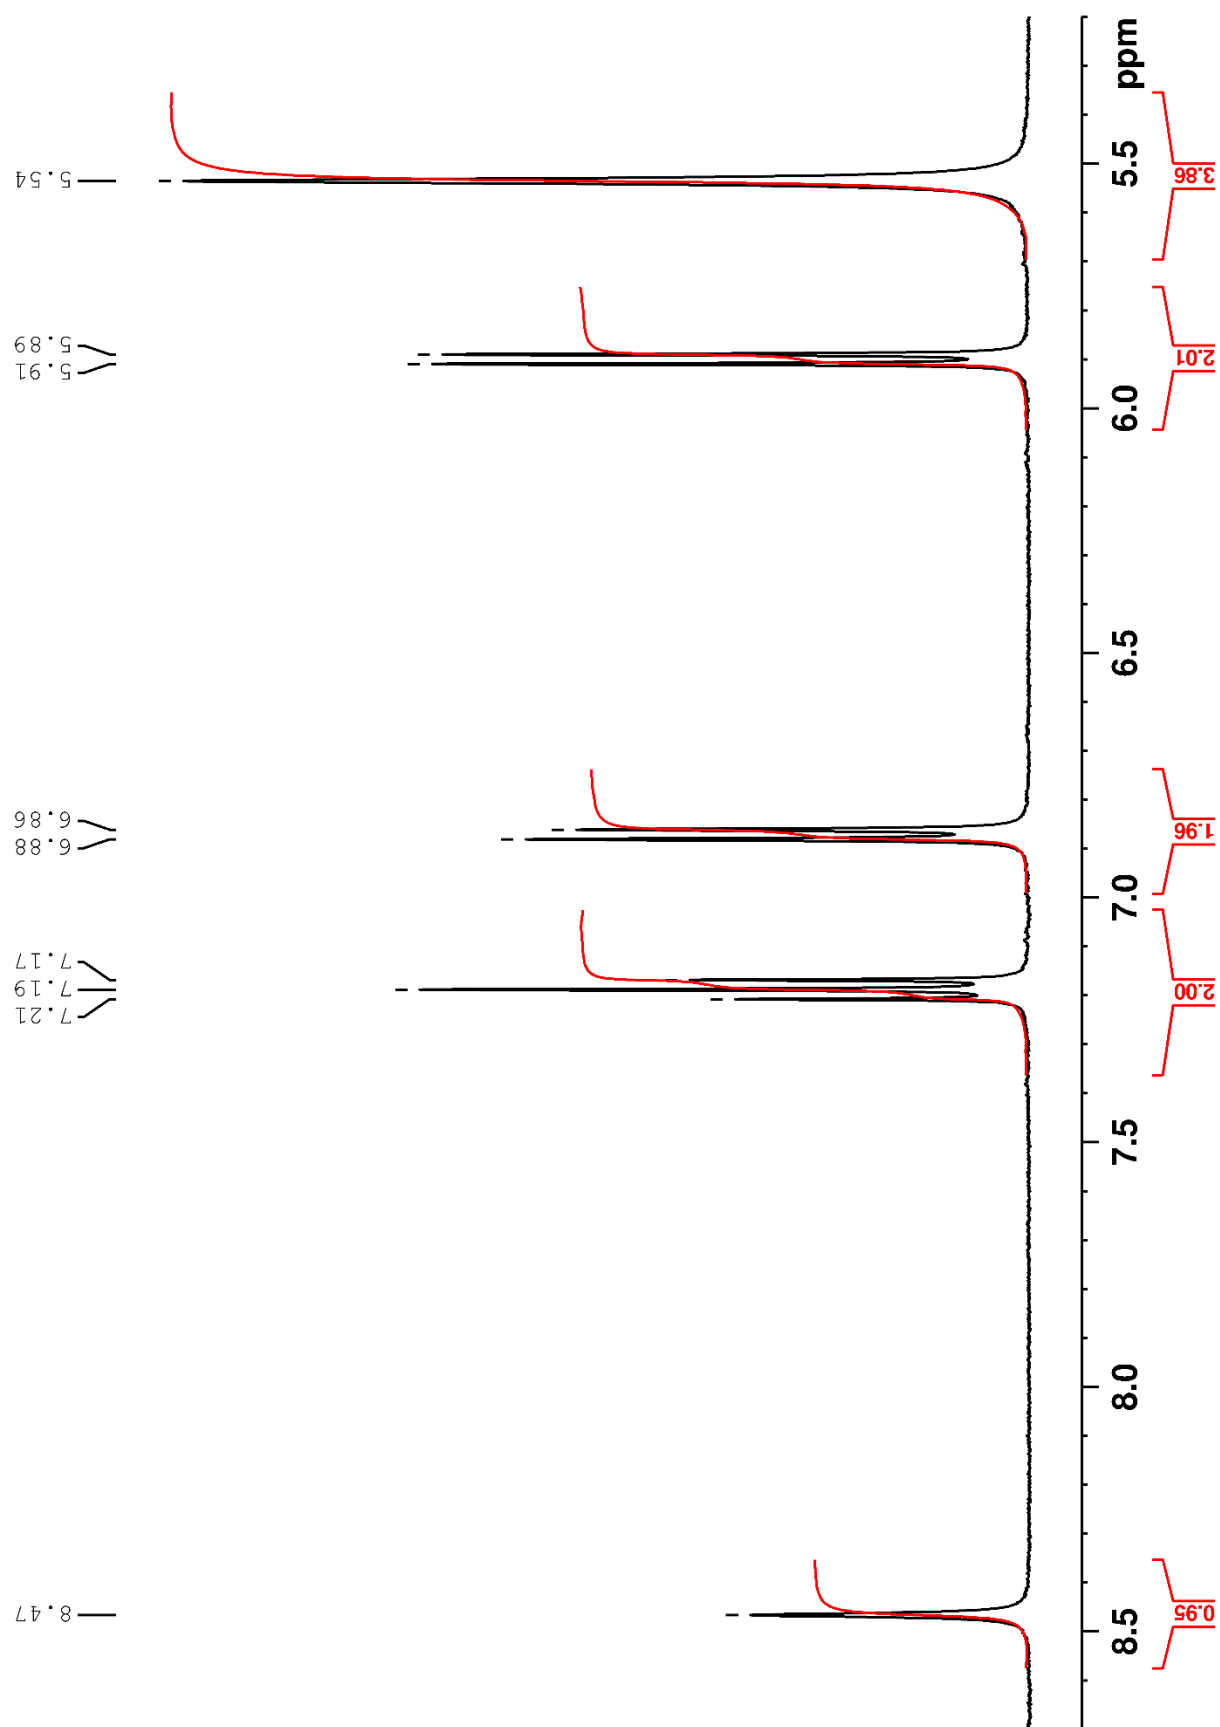

**Figure S6.**  $^1\text{H}$  NMR spectrum of  $\text{H}_5\text{A}$  in  $(\text{CD}_3)_2\text{SO}$  (400.13 MHz) at 298 K (expanded region).

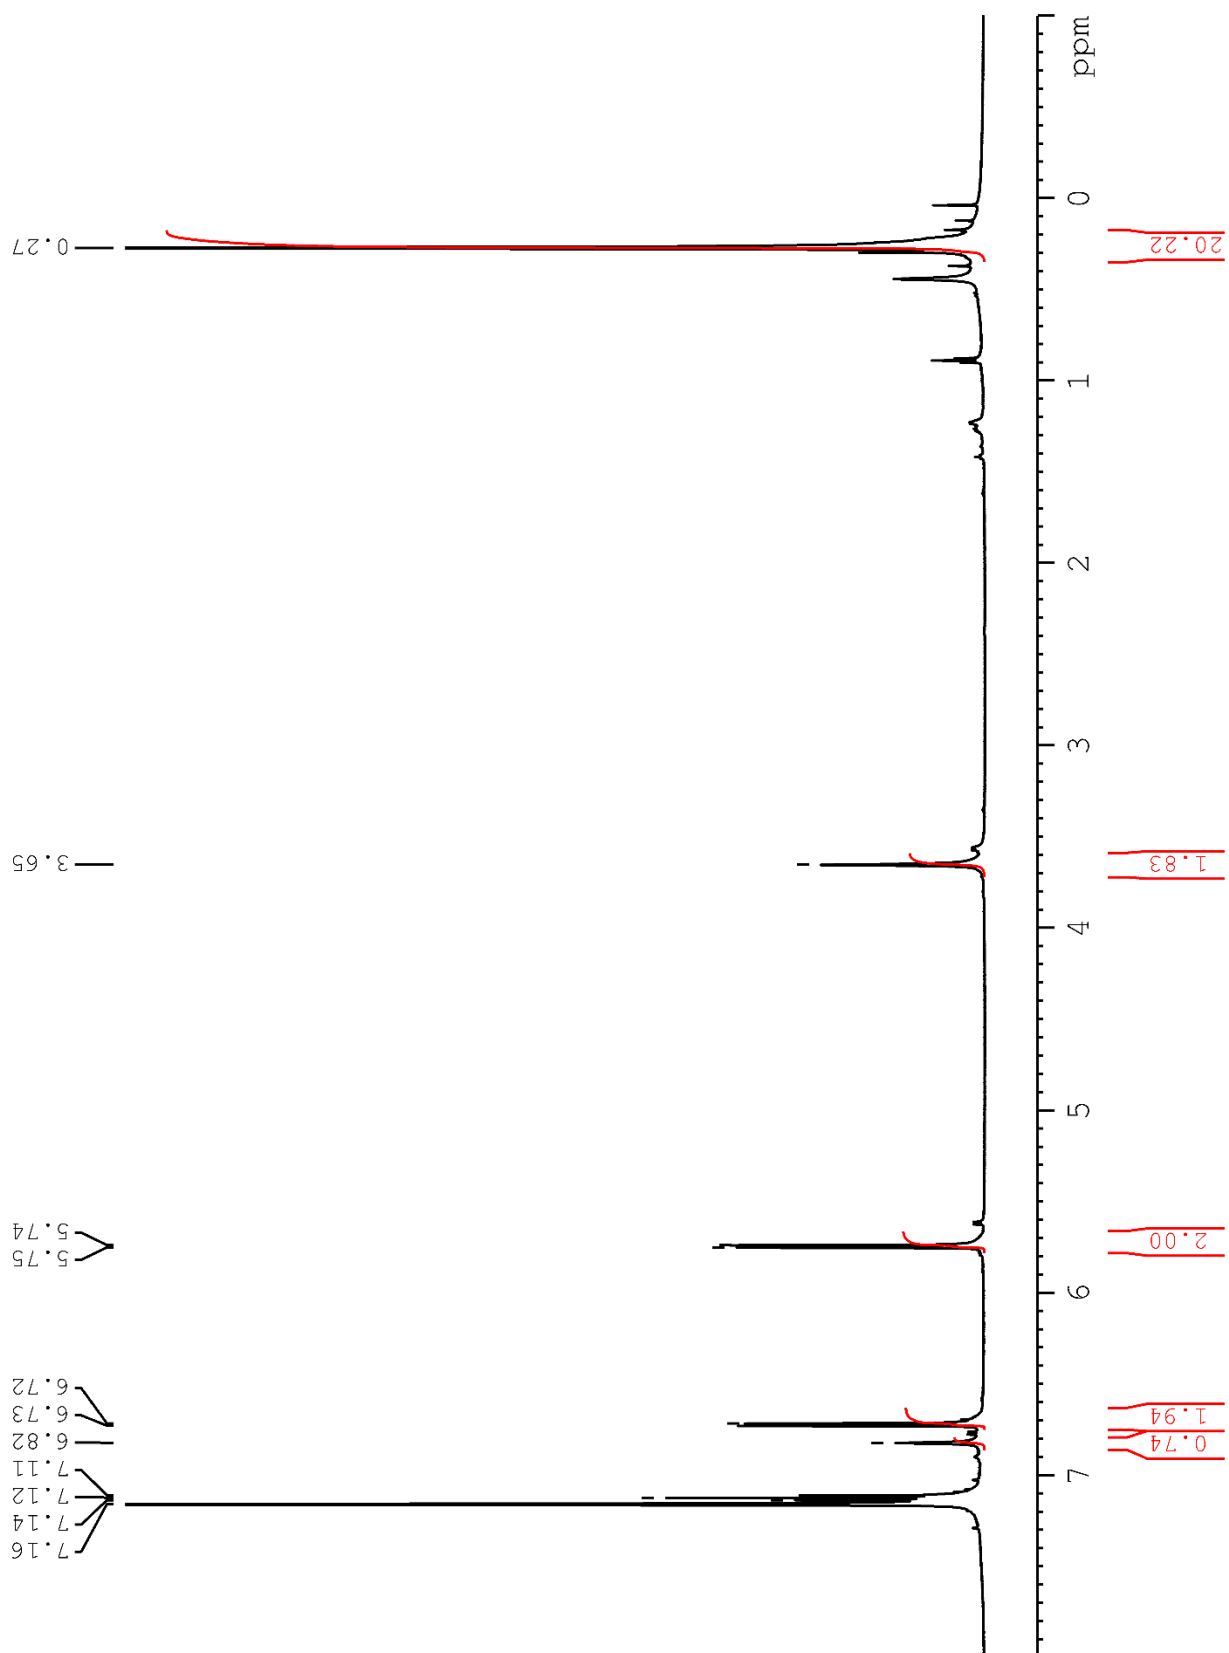

**Figure S7.**  $^1\text{H}$  NMR spectrum of  $\text{H}_3\text{L}$  in  $\text{C}_6\text{D}_6$  (600.13 MHz) at 298 K.

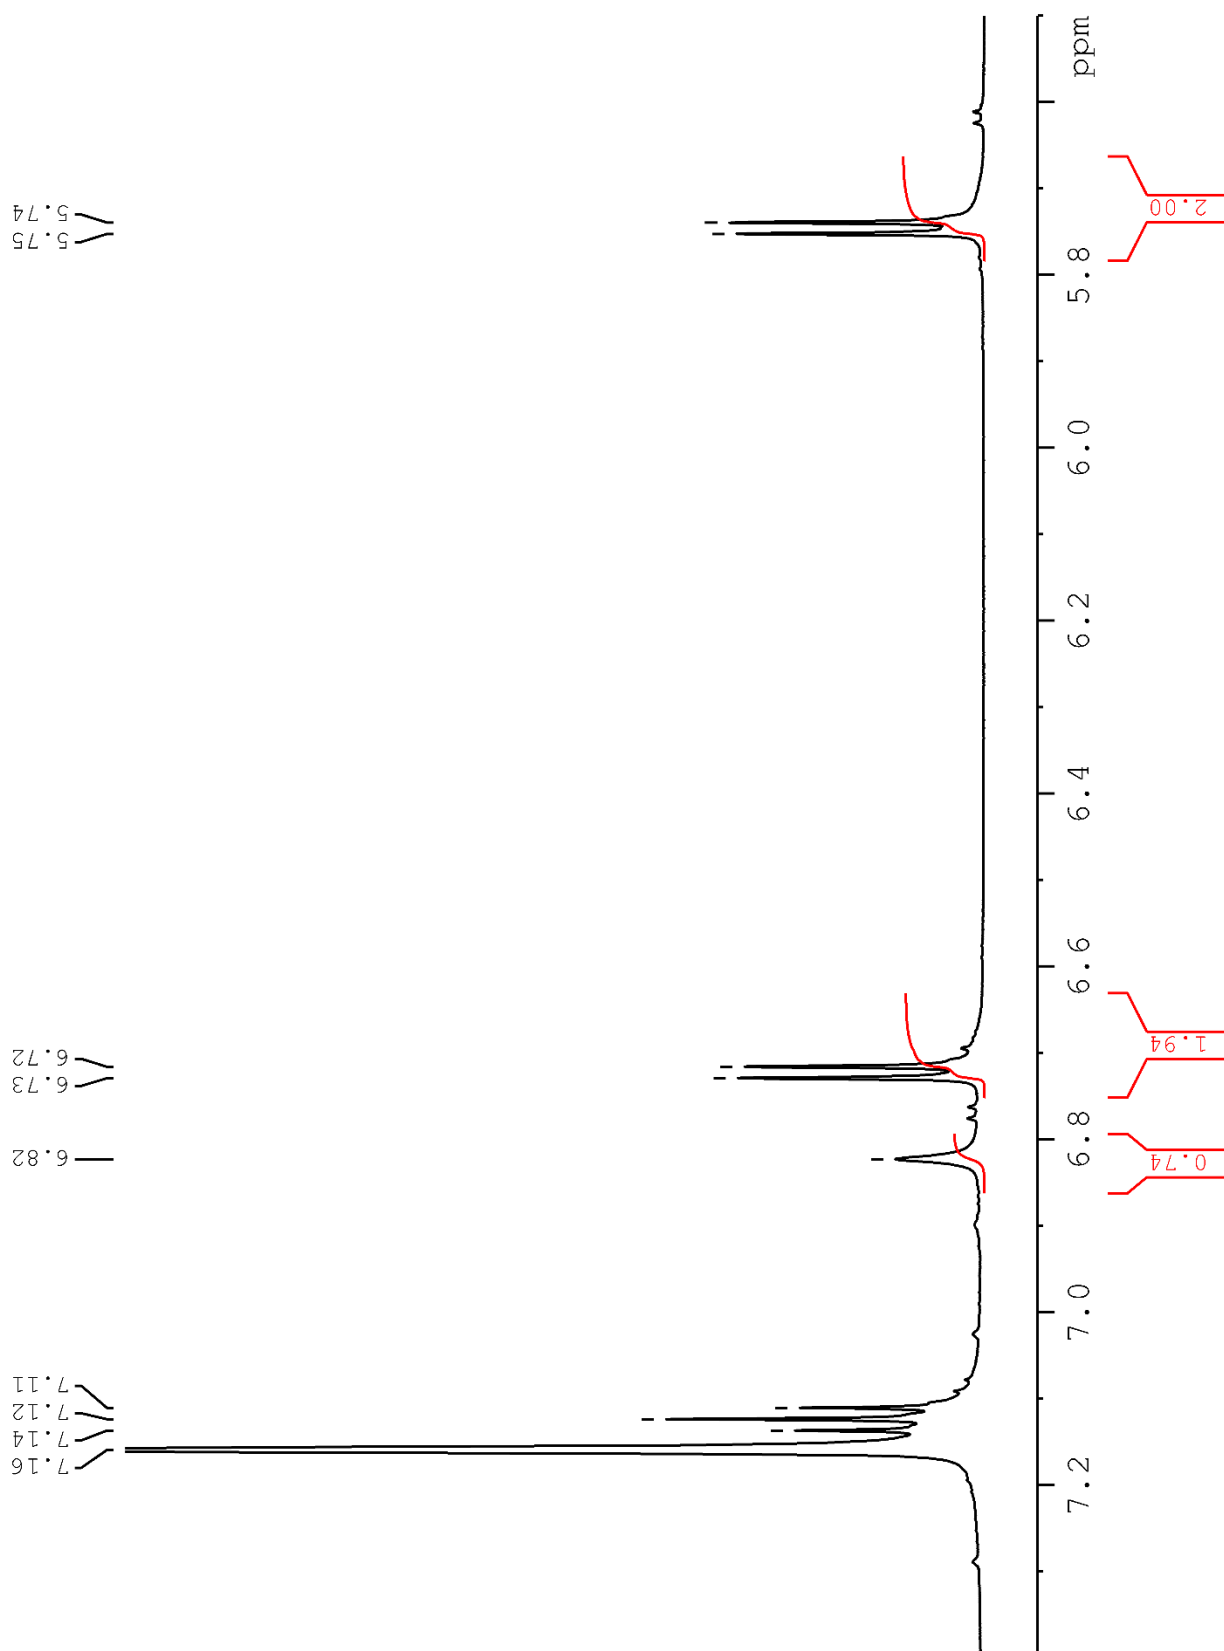

**Figure S8.**  $^1\text{H}$  NMR spectrum of  $\text{H}_3\text{L}$  in  $\text{C}_6\text{D}_6$  (600.13 MHz) at 298 K (expanded region).

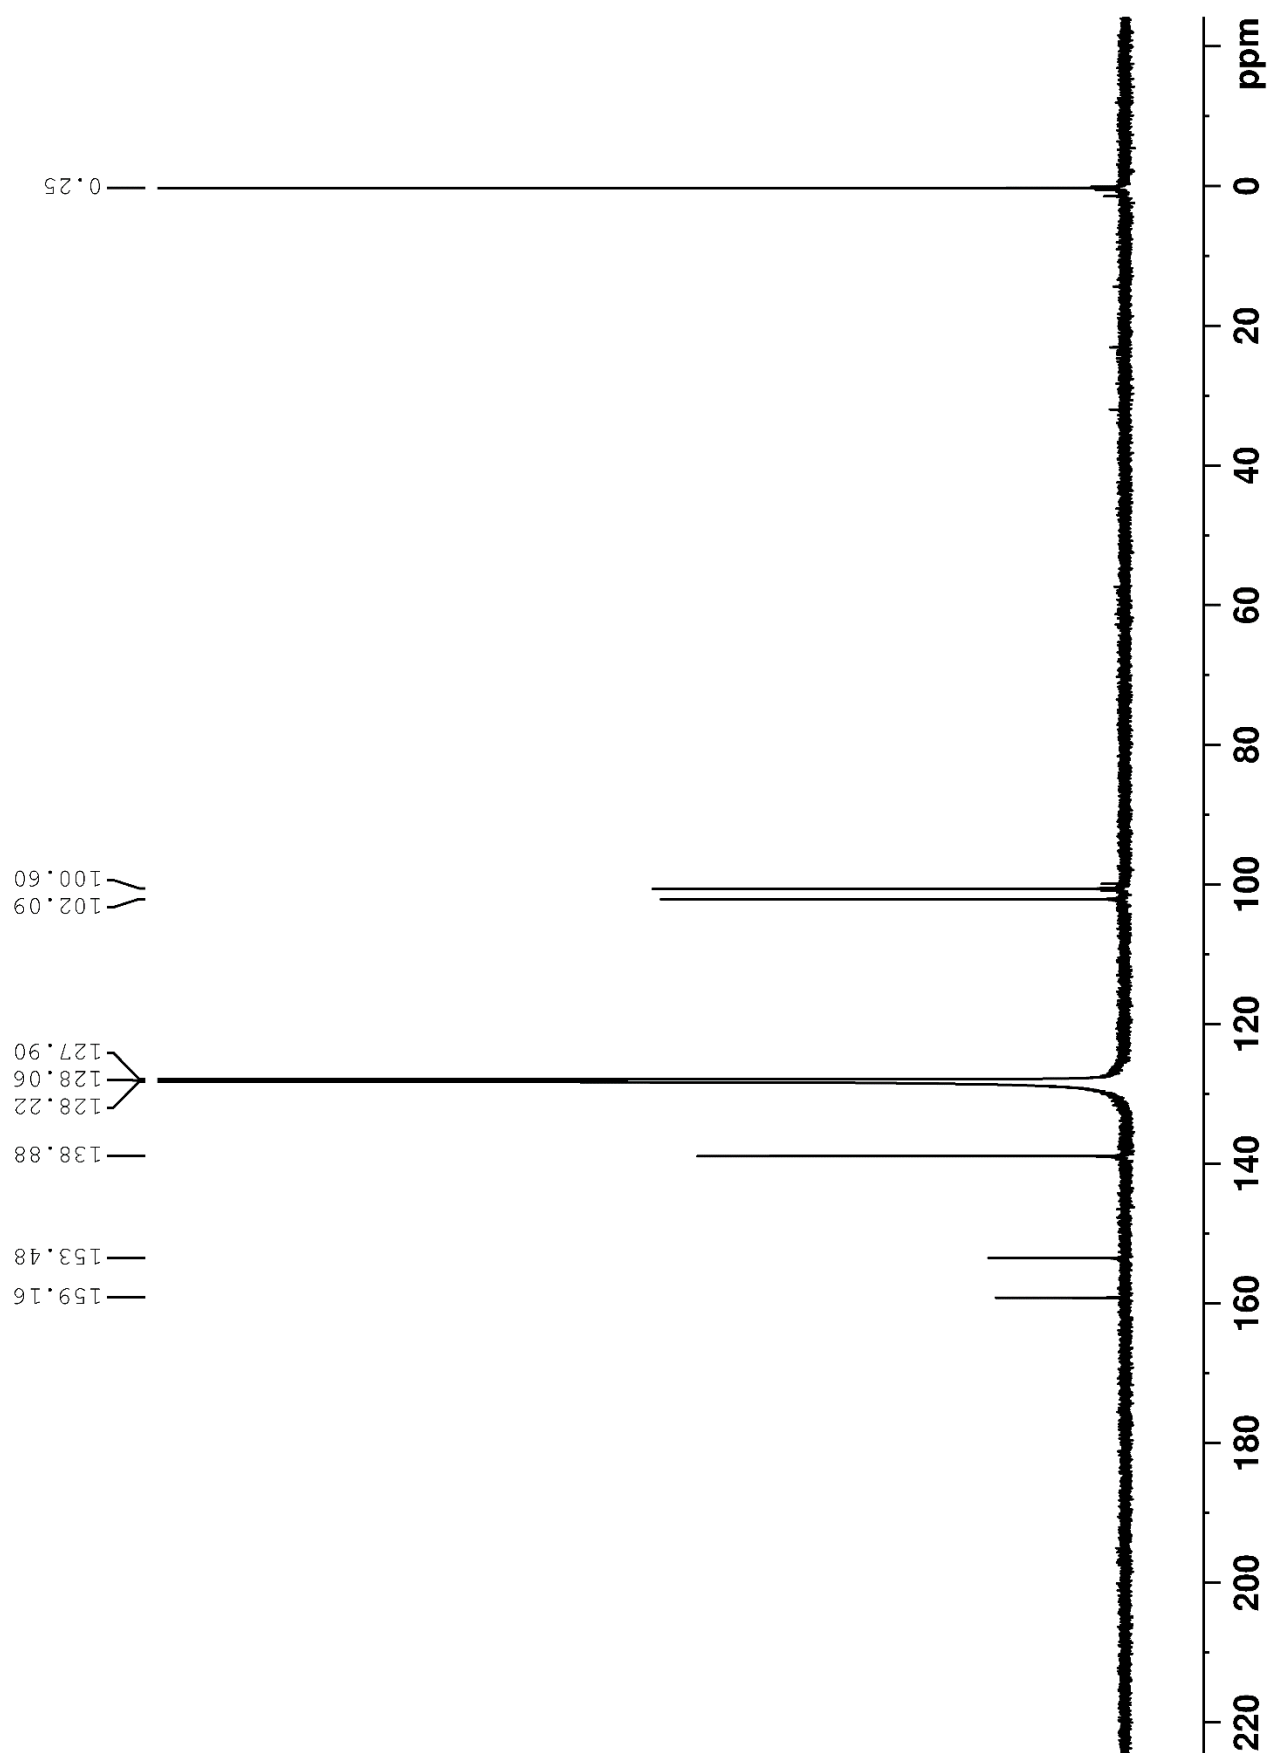

**Figure S9.**  $^{13}\text{C}$  NMR spectrum of  $\text{H}_3\text{L}$  in  $\text{C}_6\text{D}_6$  (150.90 MHz) at 298 K.

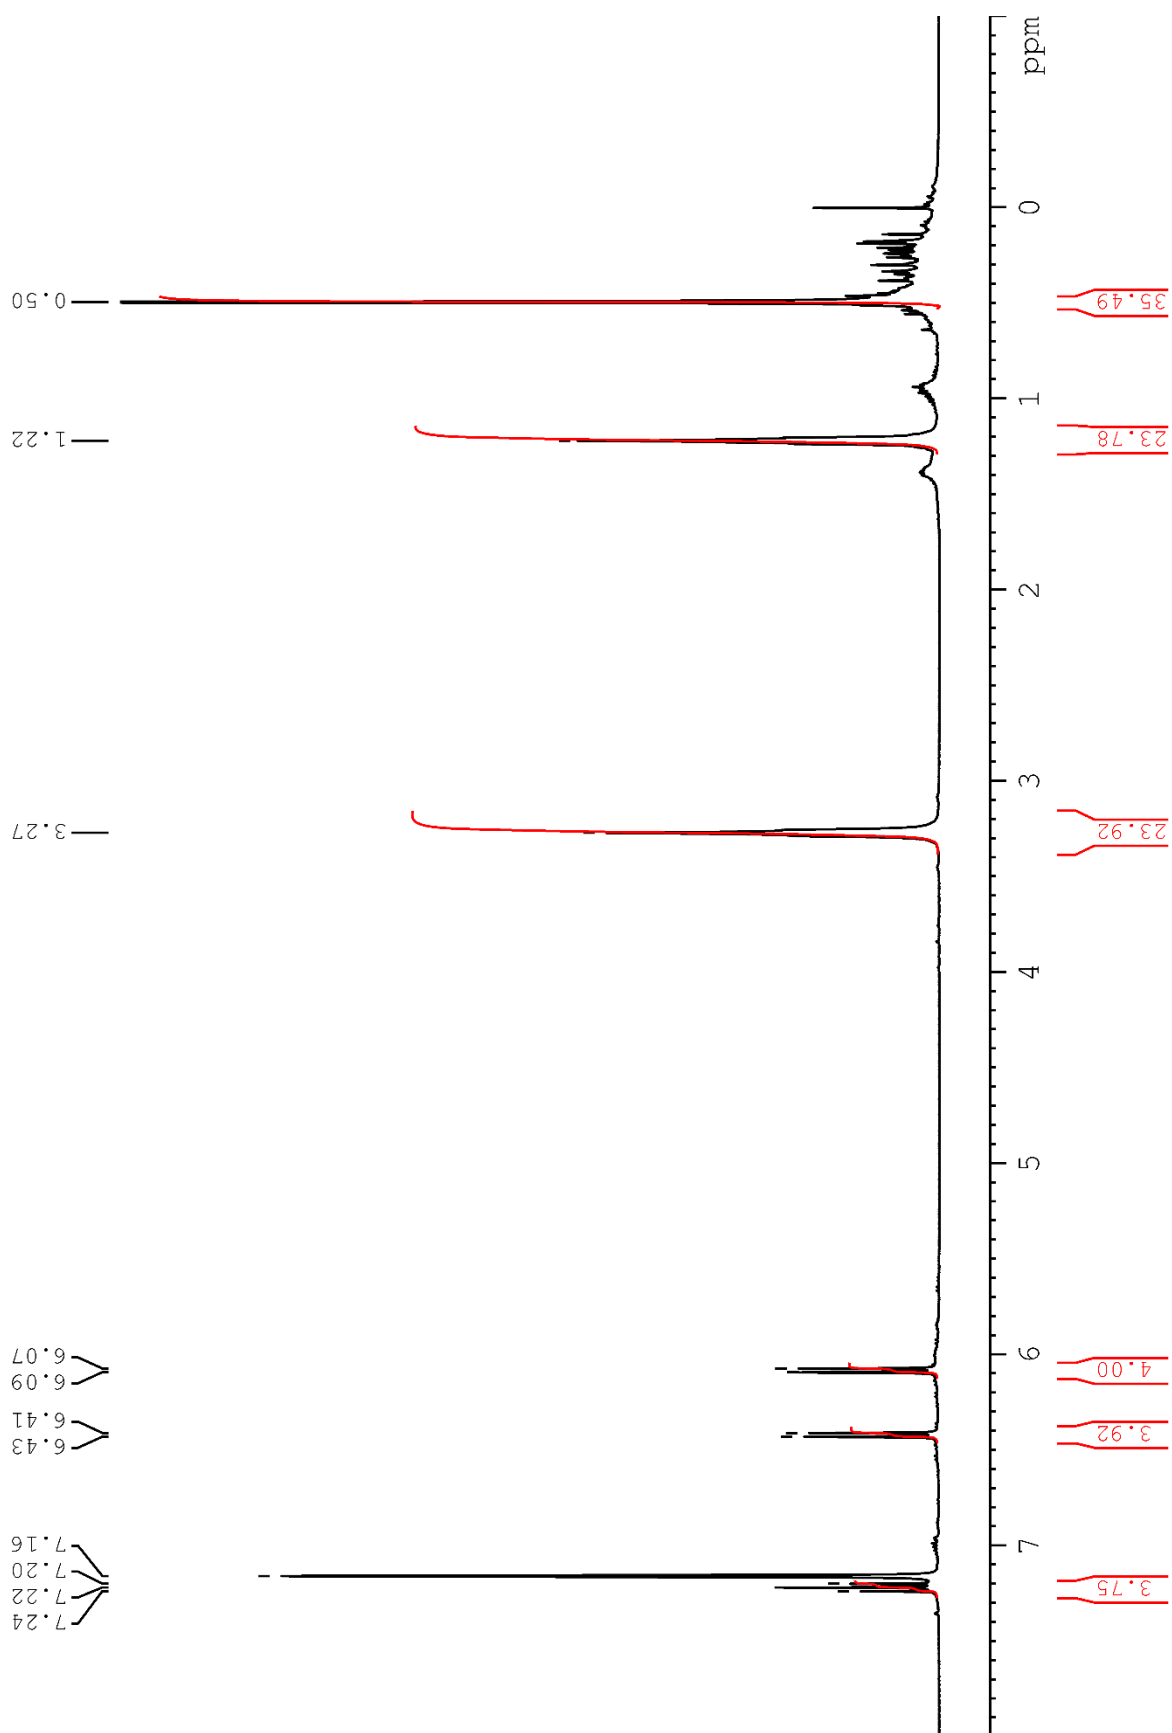

**Figure S10.**  $^1\text{H}$  NMR spectrum of crude **1** in  $\text{C}_6\text{D}_6$  (400.13 MHz) at 298 K.  $\delta$  = 0.50 (s, 36H,  $(\text{CH}_3)_3\text{Si}$ ), 1.22 (m, 24H,  $\text{CH}_2\text{CH}_2\text{O}_{\text{thf}}$ ), 3.27 (m, 24H,  $\text{CH}_2\text{O}_{\text{thf}}$ ), 6.08 (d,  $^3J_{\text{H-H}} = 8.0$  Hz, 4H,  $\text{H}^5$ ), 6.42 (d,  $^3J_{\text{H-H}} = 7.8$  Hz, 4H,  $\text{H}^3$ ), 7.22 ppm (t,  $^3J_{\text{H-H}} = 8.2$  Hz, 4H,  $\text{H}^4$ ).

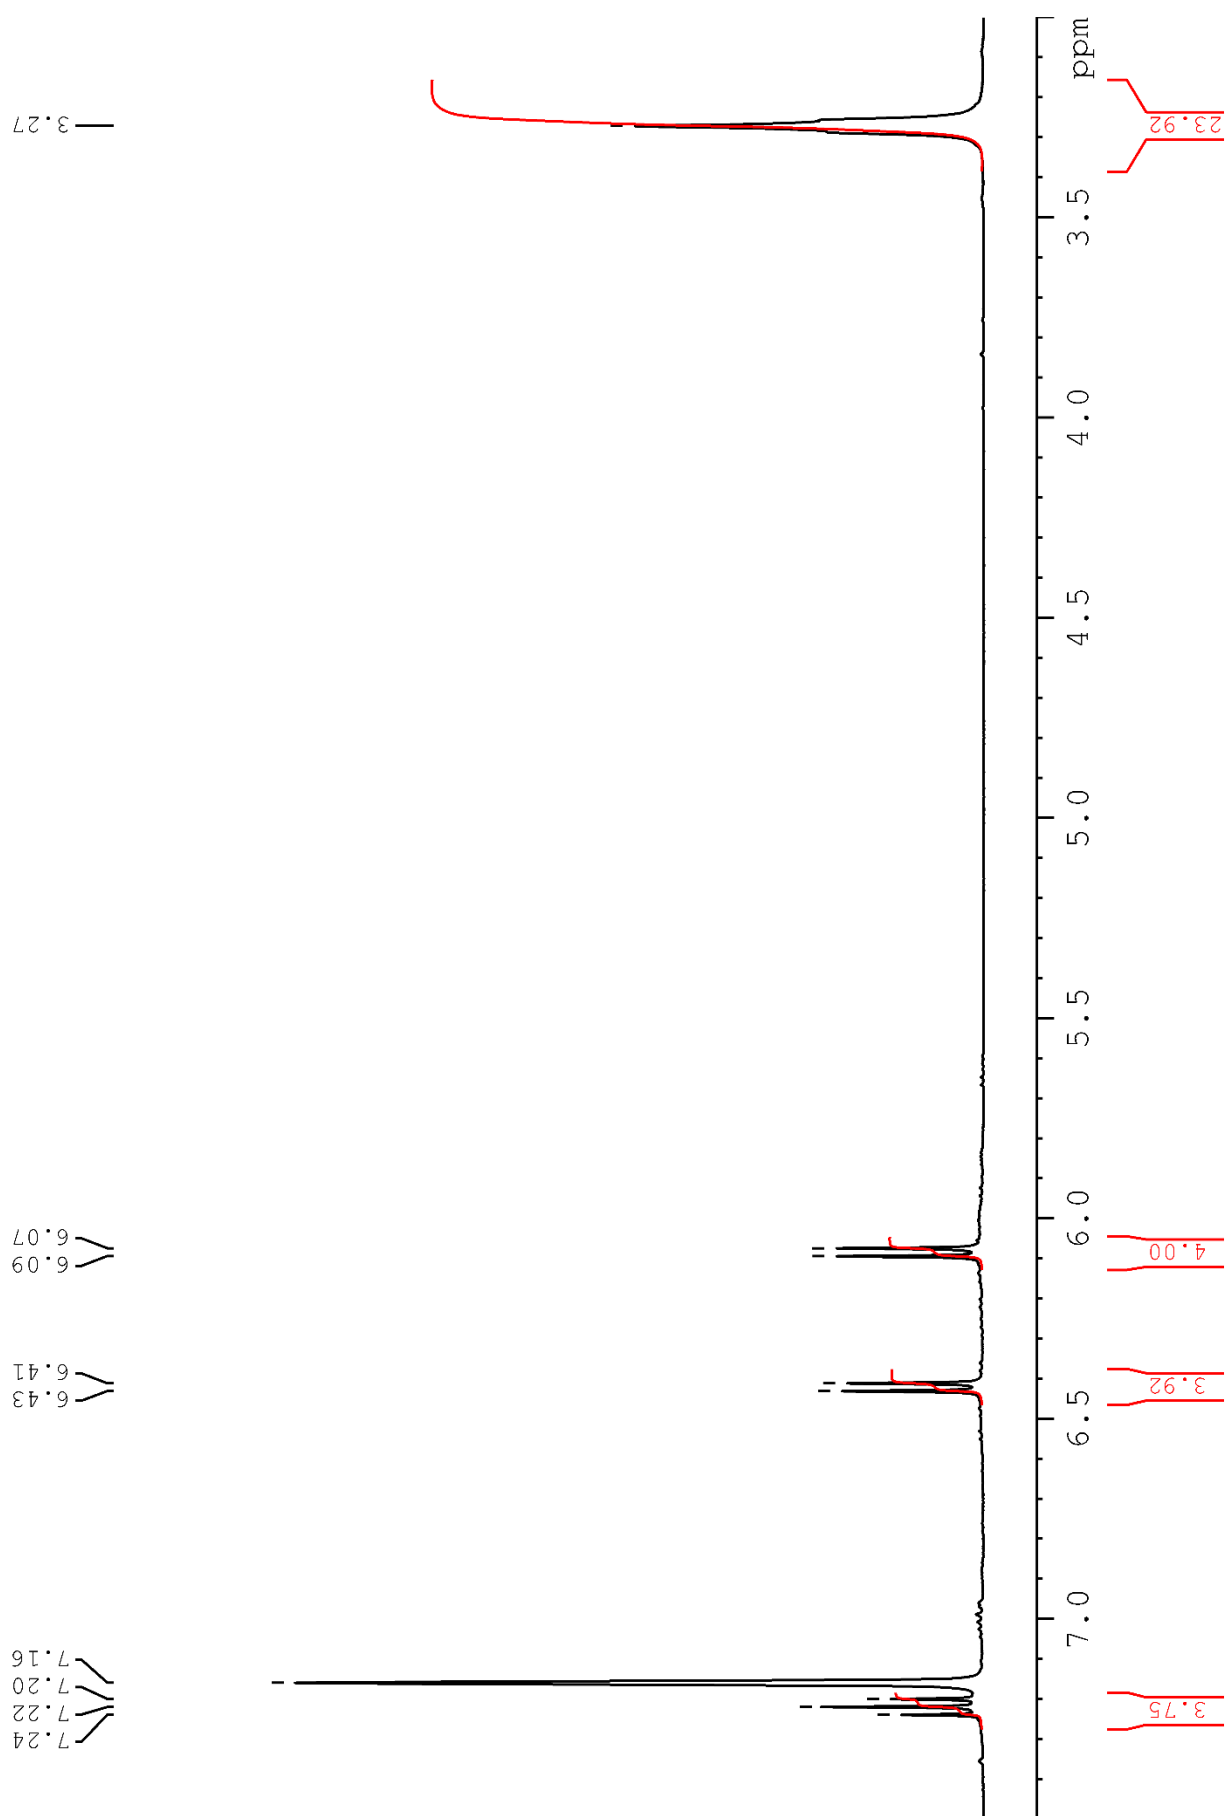

**Figure S11.**  $^1\text{H}$  NMR spectrum of crude **1** in  $\text{C}_6\text{D}_6$  (400.13 MHz) at 298 K (expanded region).

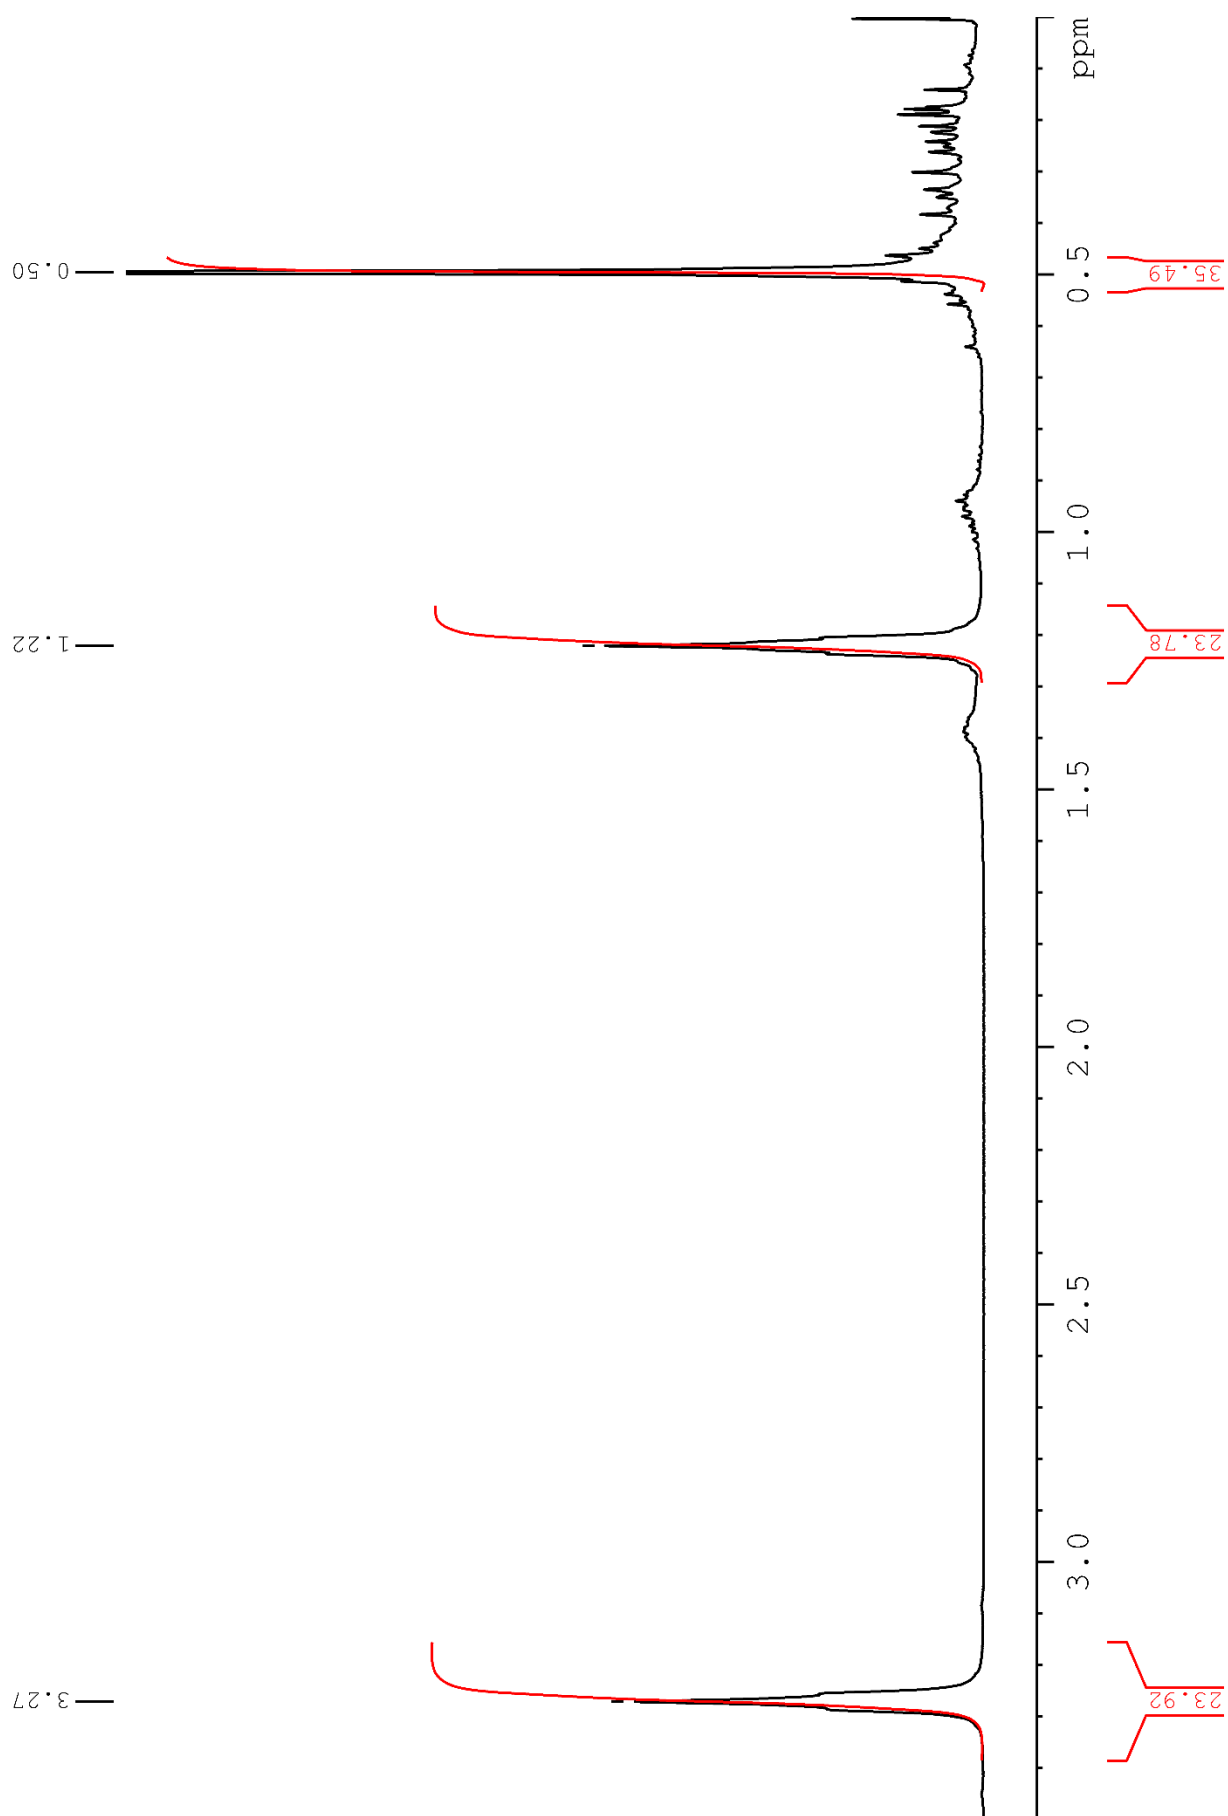

**Figure S12.**  $^1\text{H}$  NMR spectrum of crude **1** in  $\text{C}_6\text{D}_6$  (400.13 MHz) at 298 K (expanded region).

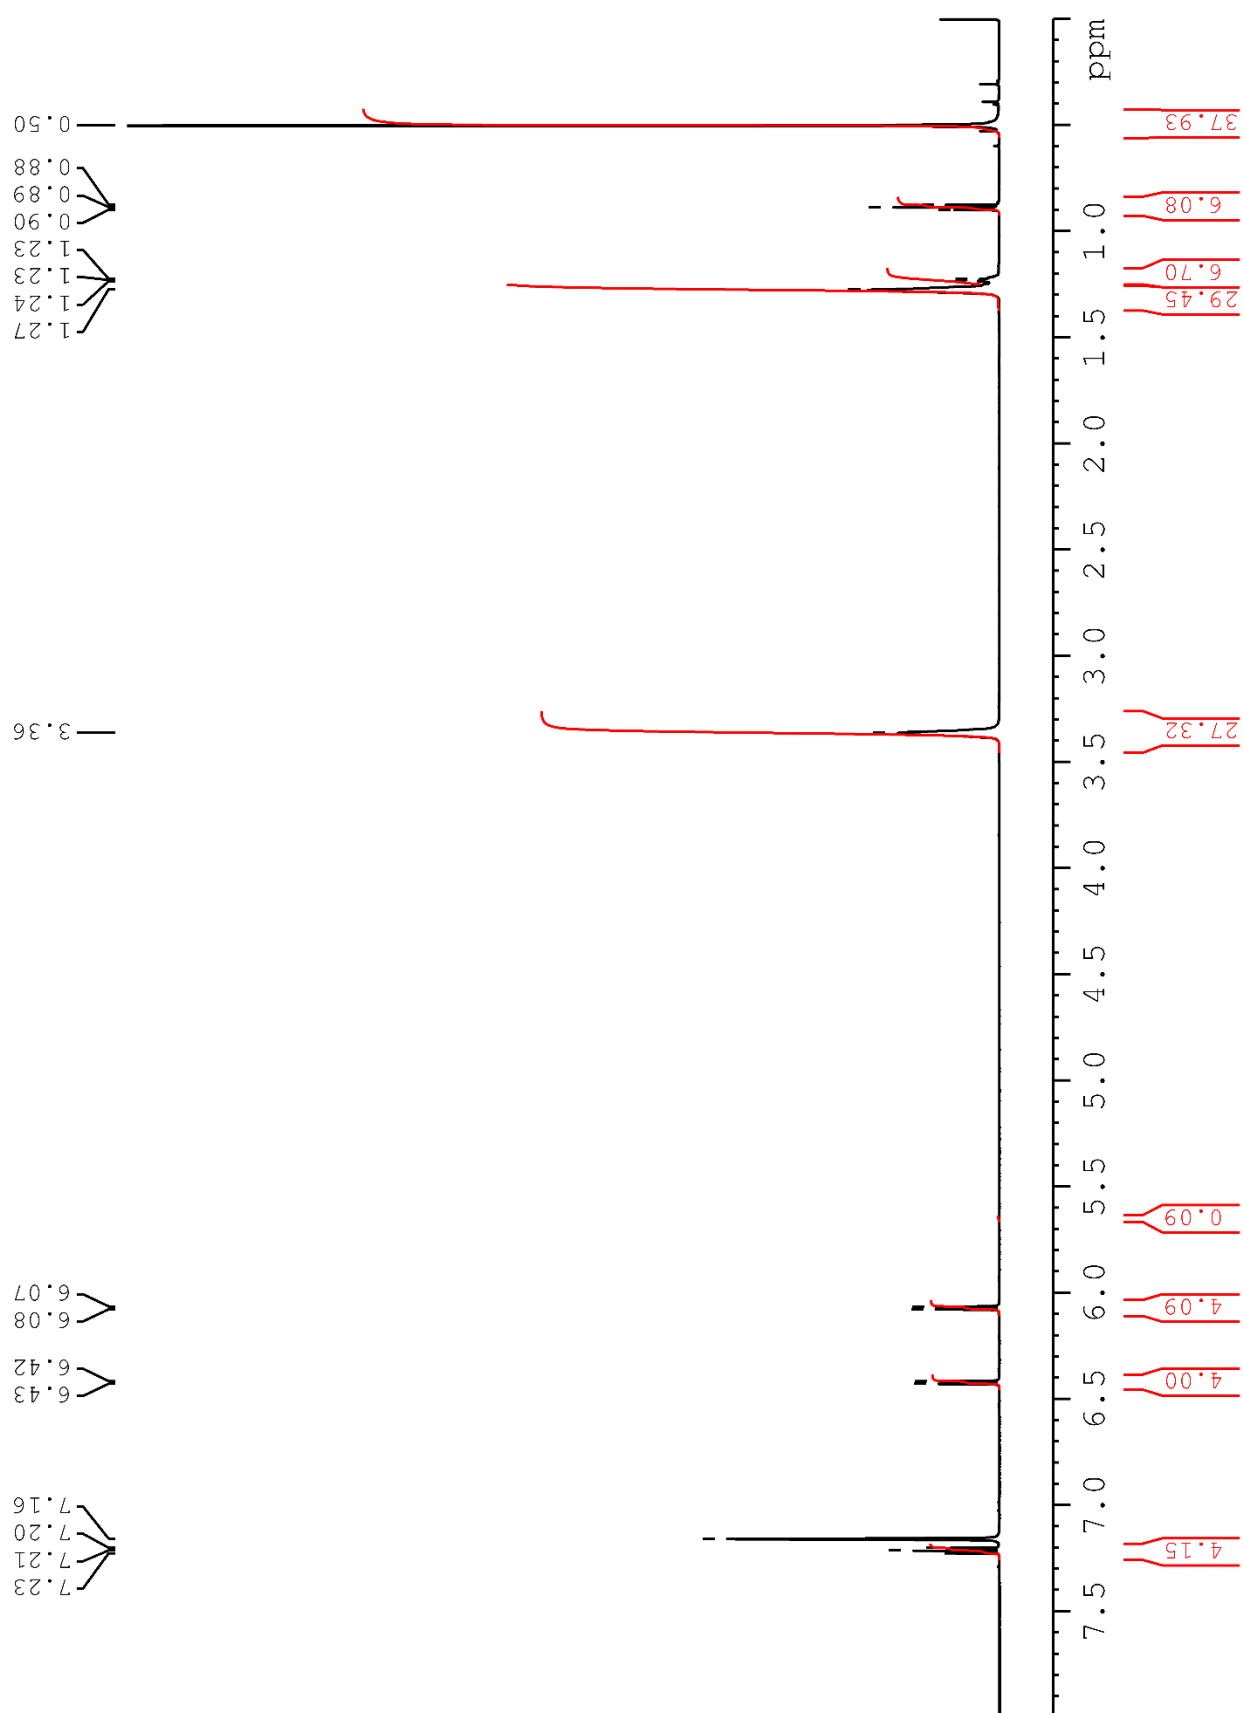

**Figure S13.**  $^1\text{H}$  NMR spectrum of  $1\text{-C}_6\text{H}_{14}$  in  $\text{C}_6\text{D}_6$  (600.13 MHz) at 298 K.

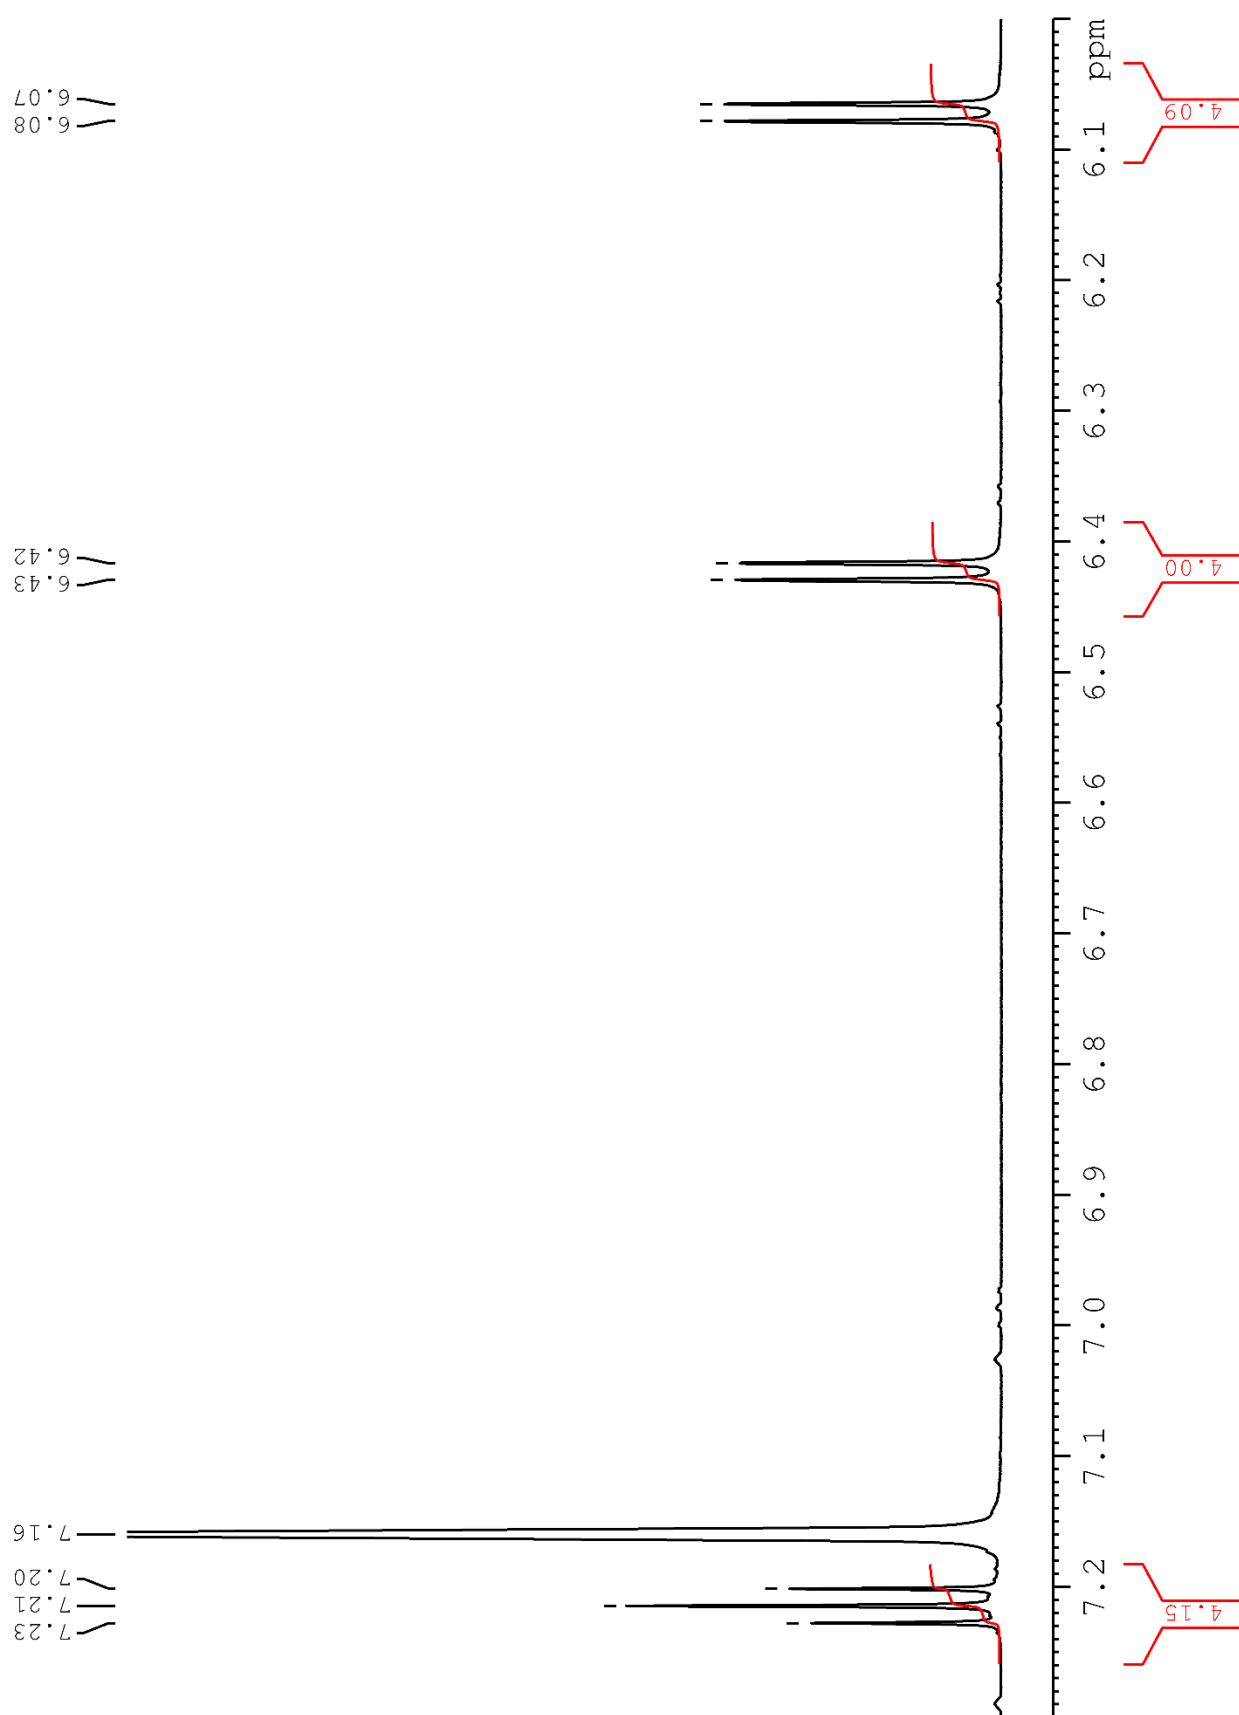

**Figure S14.**  $^1\text{H}$  NMR spectrum of  $1\text{-C}_6\text{H}_{14}$  in  $\text{C}_6\text{D}_6$  (600.13 MHz) at 298 K (expanded region).

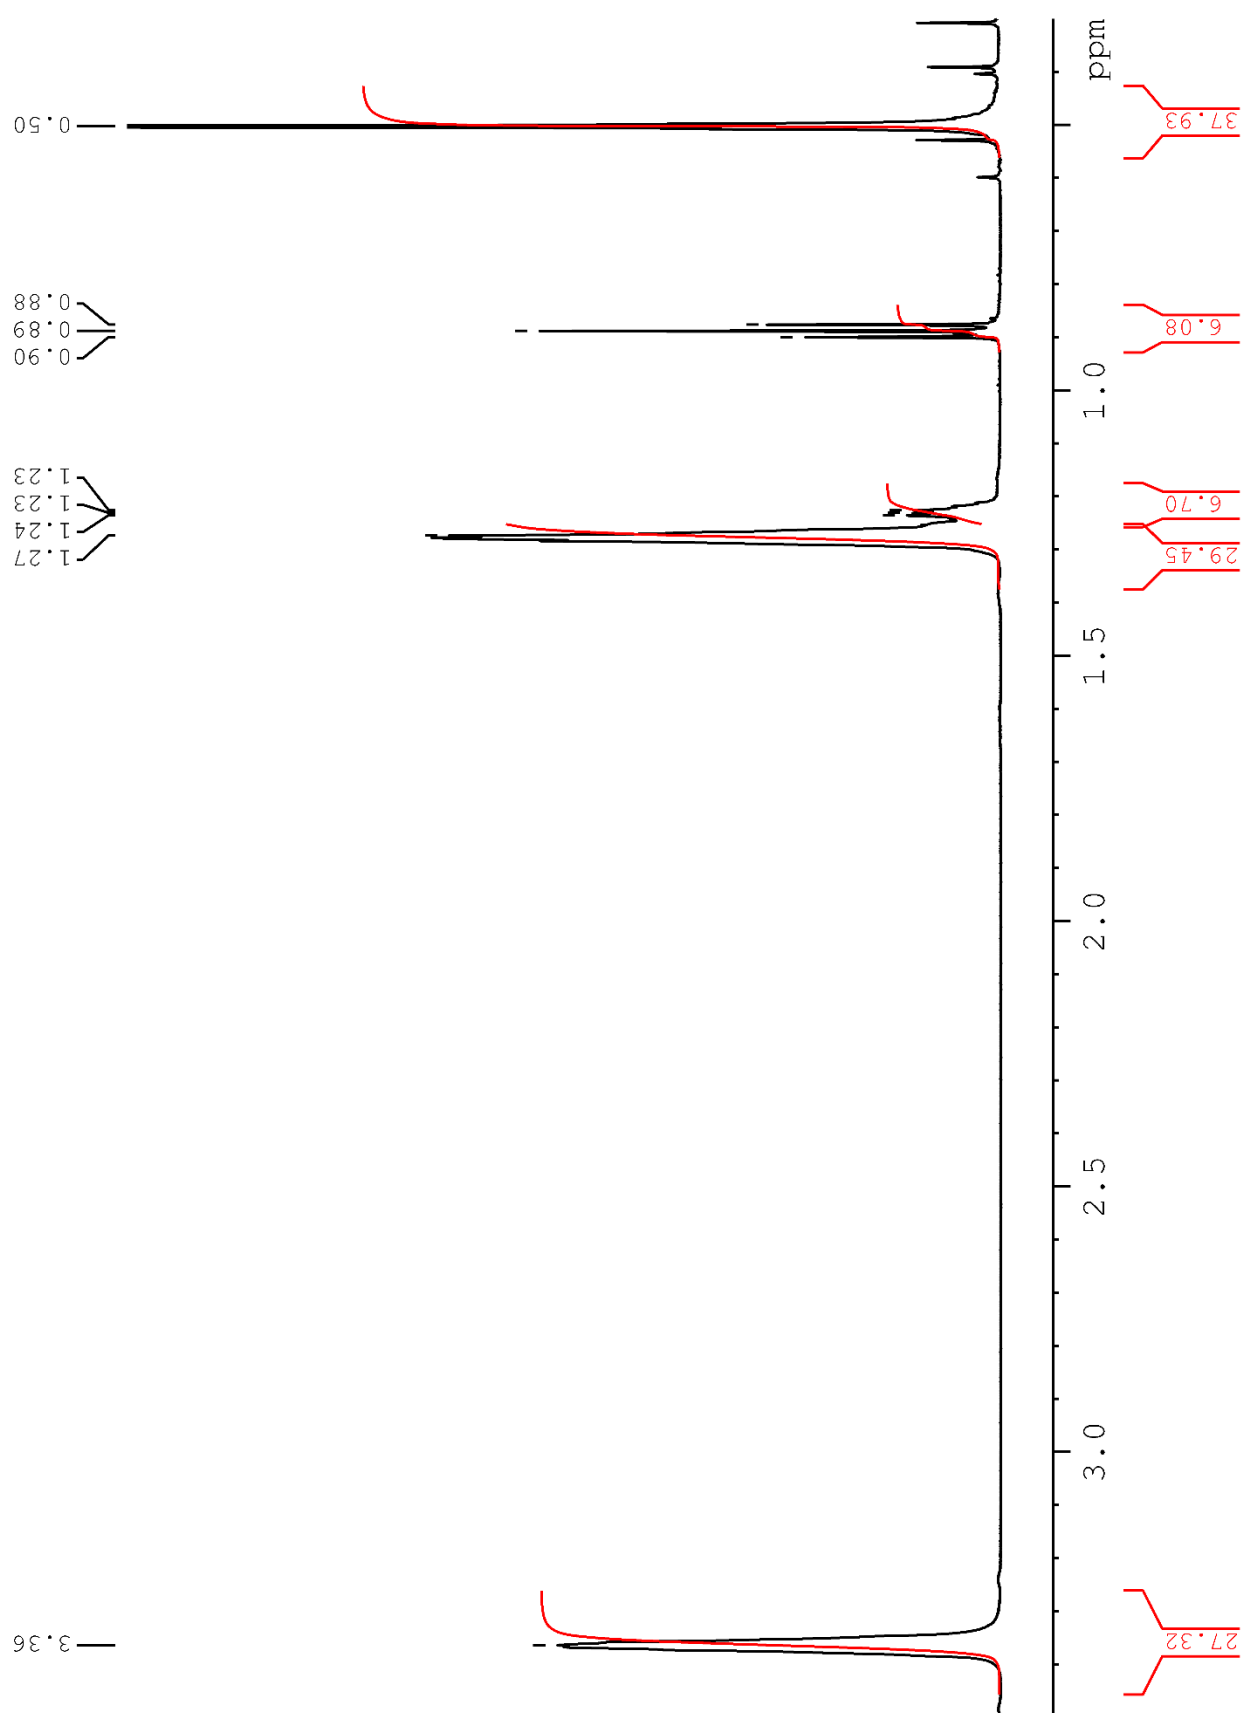

**Figure S15.**  $^1\text{H}$  NMR spectrum of **1**·C<sub>6</sub>H<sub>14</sub> in C<sub>6</sub>D<sub>6</sub> (600.13 MHz) at 298 K (expanded region).

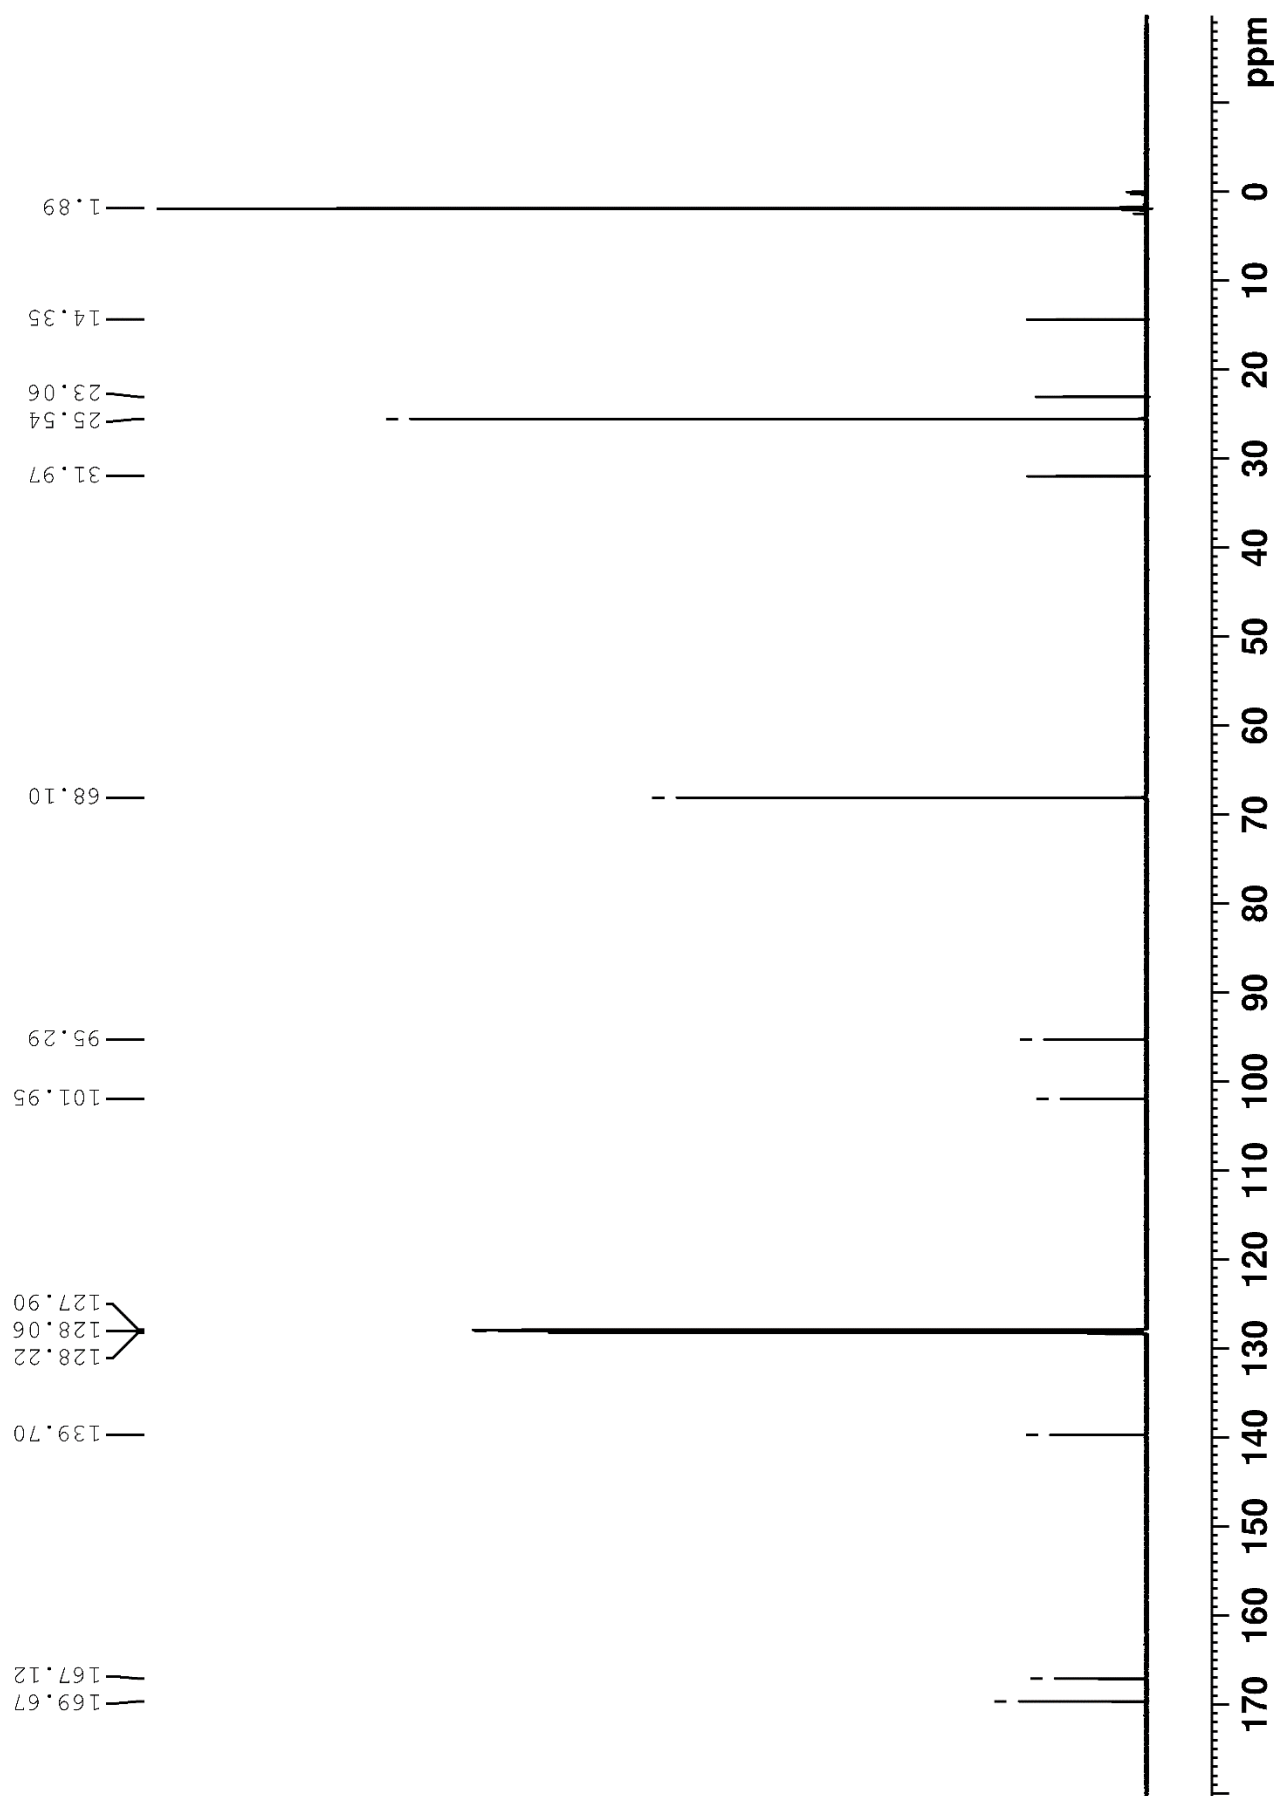

**Figure S16.** <sup>13</sup>C NMR spectrum of **1**-C<sub>6</sub>H<sub>14</sub> in C<sub>6</sub>D<sub>6</sub> (150.90 MHz) at 298 K.

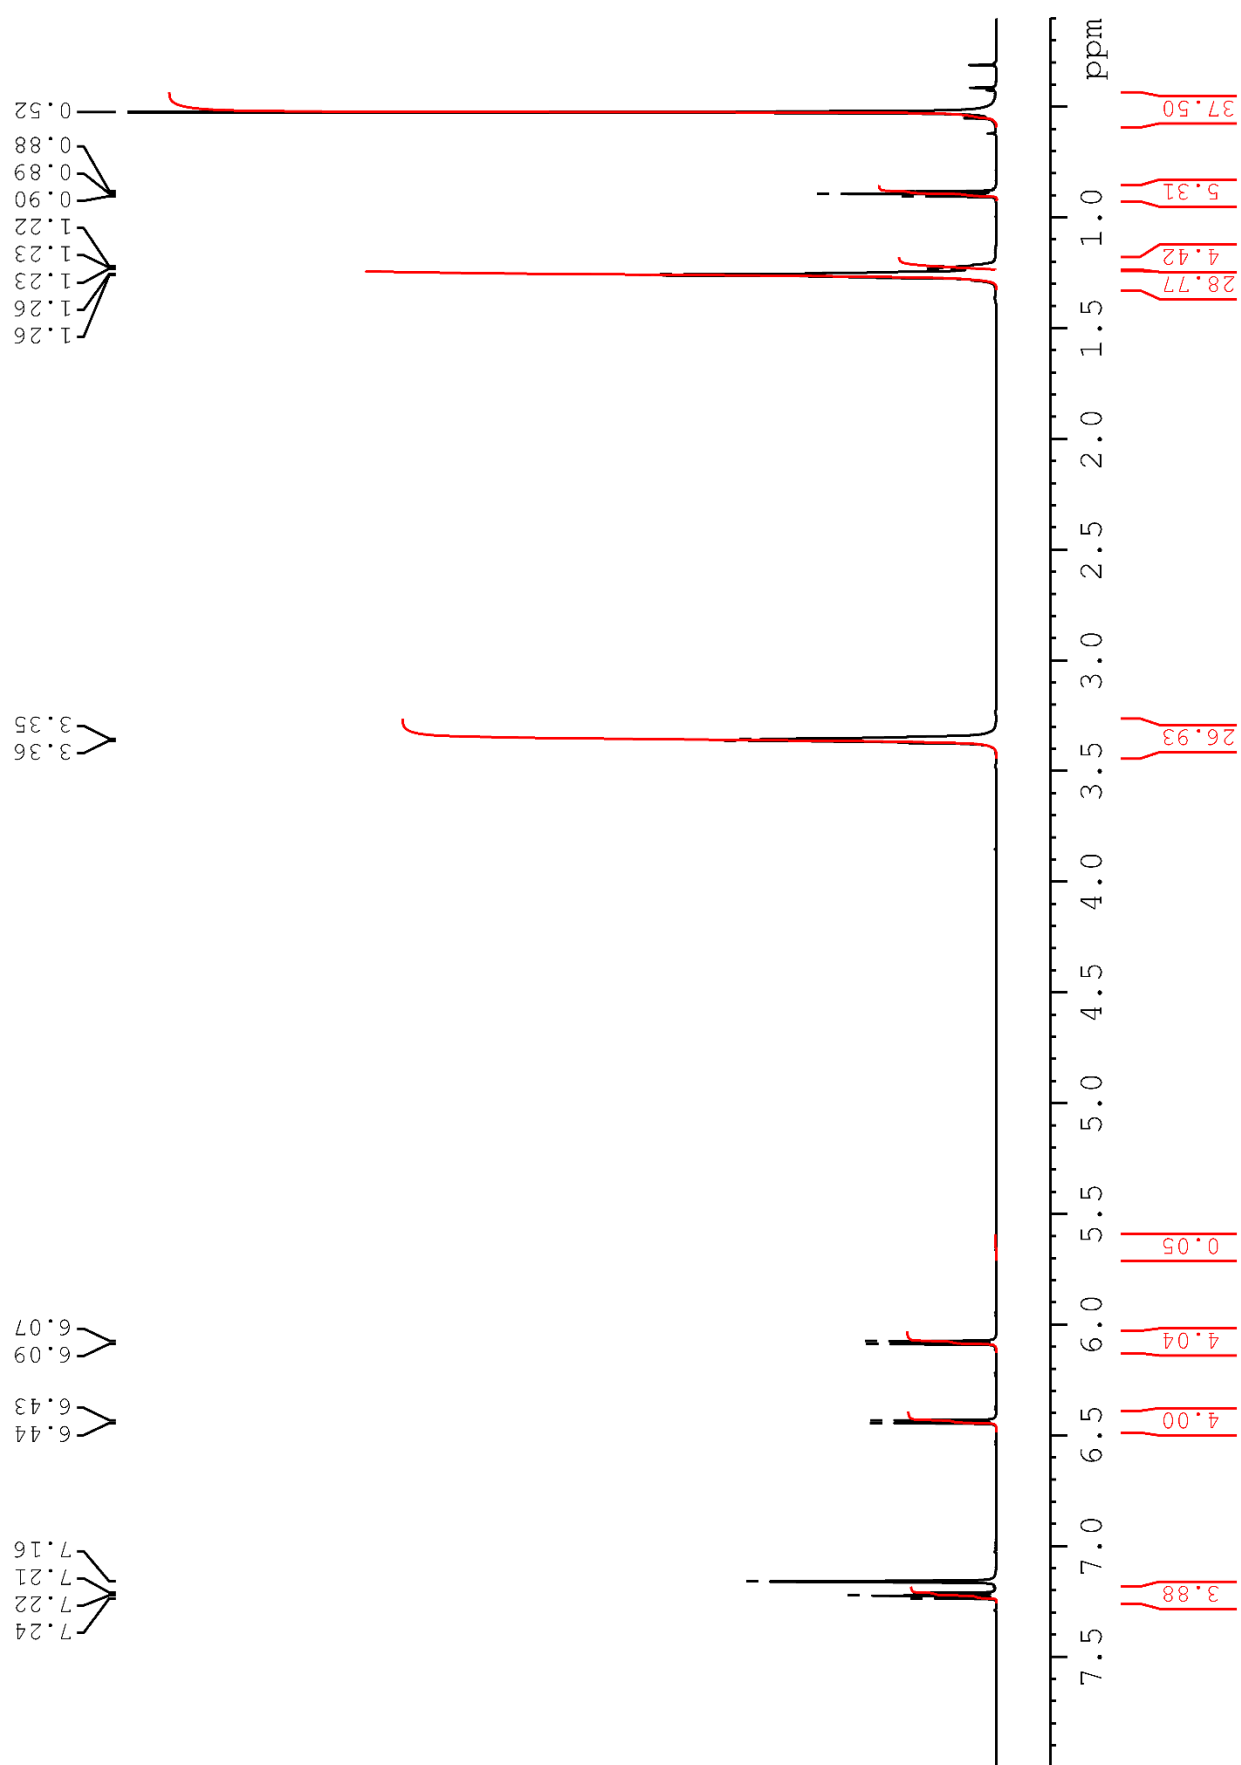

**Figure S17.** <sup>1</sup>H NMR spectrum of **1**·C<sub>6</sub>H<sub>14</sub> in C<sub>6</sub>D<sub>6</sub> (600.13 MHz) at 283 K.

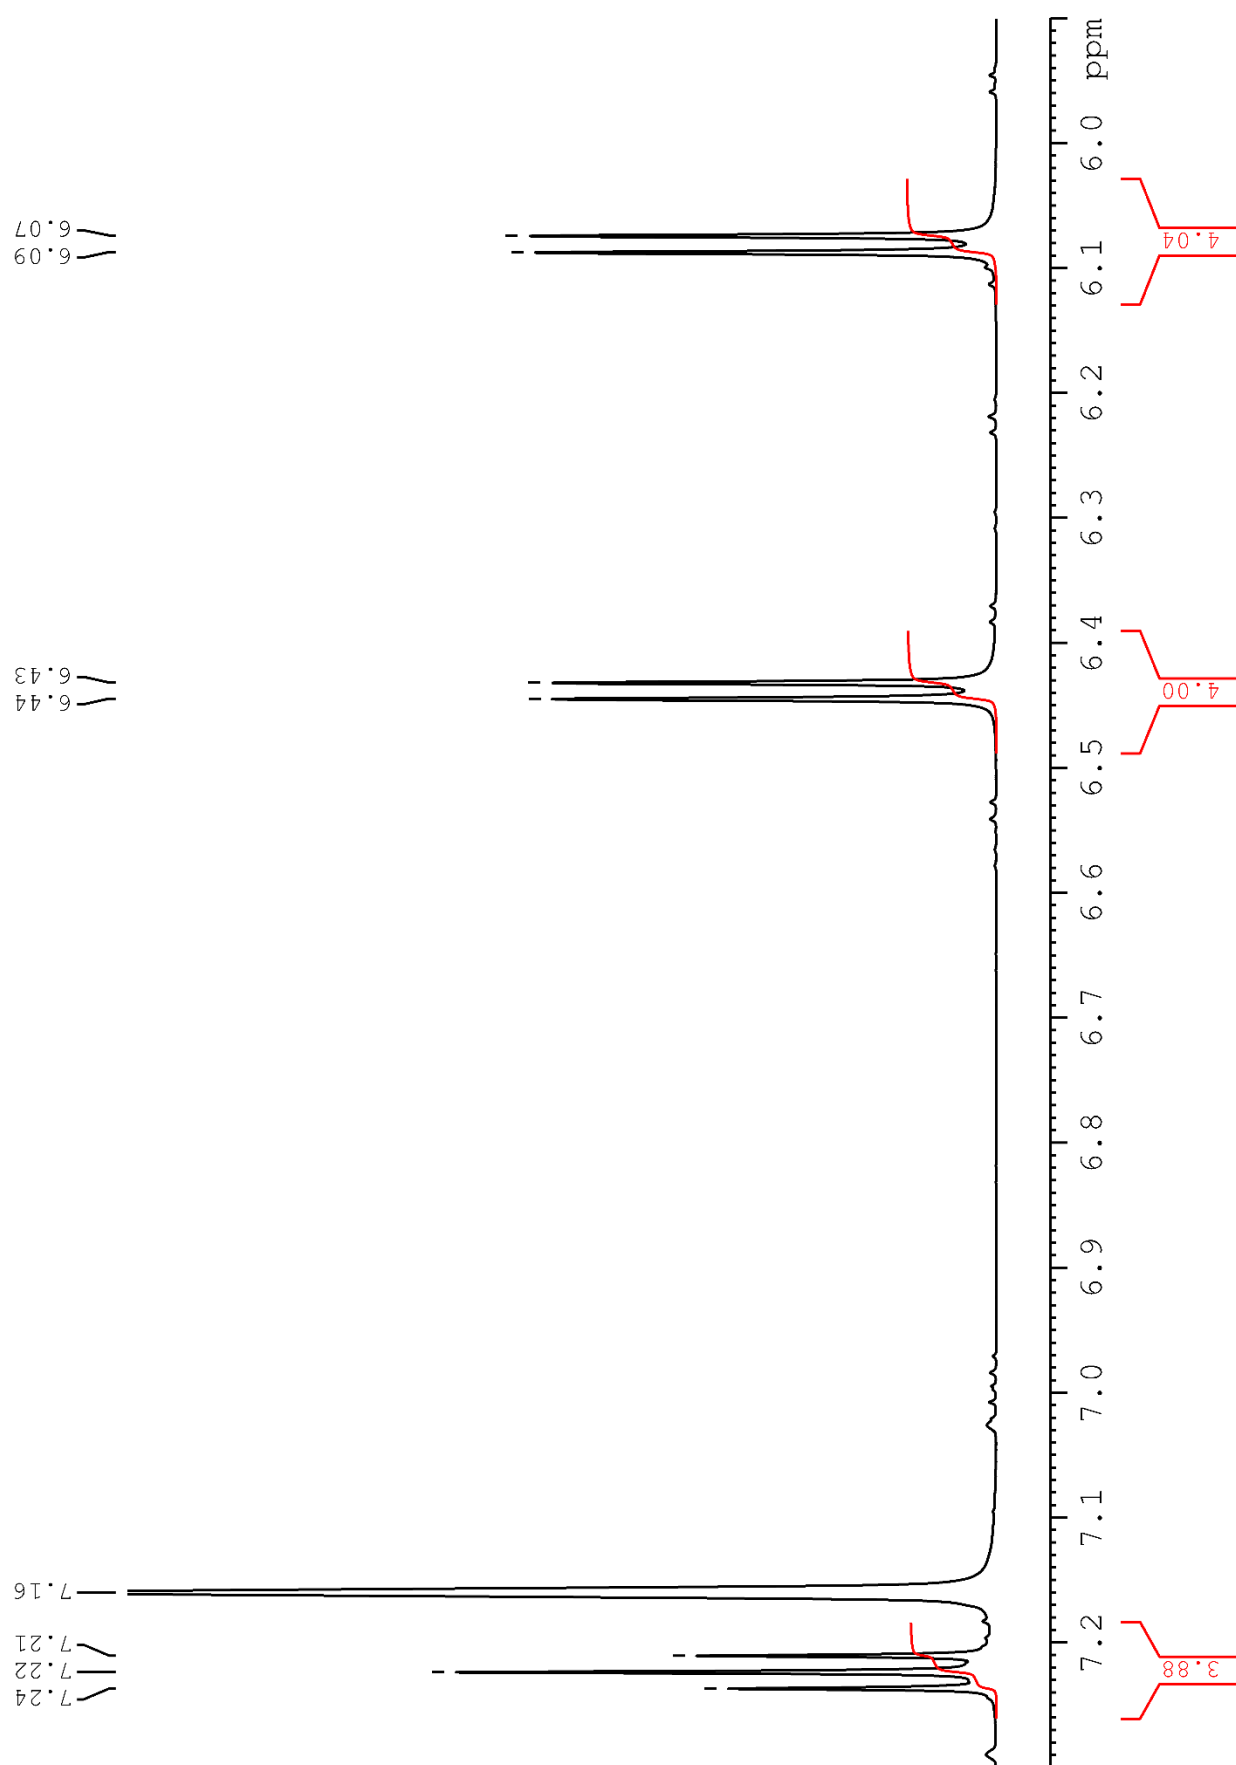

**Figure S18.**  $^1\text{H}$  NMR spectrum of  $1\text{-C}_6\text{H}_{14}$  in  $\text{C}_6\text{D}_6$  (600.13 MHz) at 283 K (expanded region).

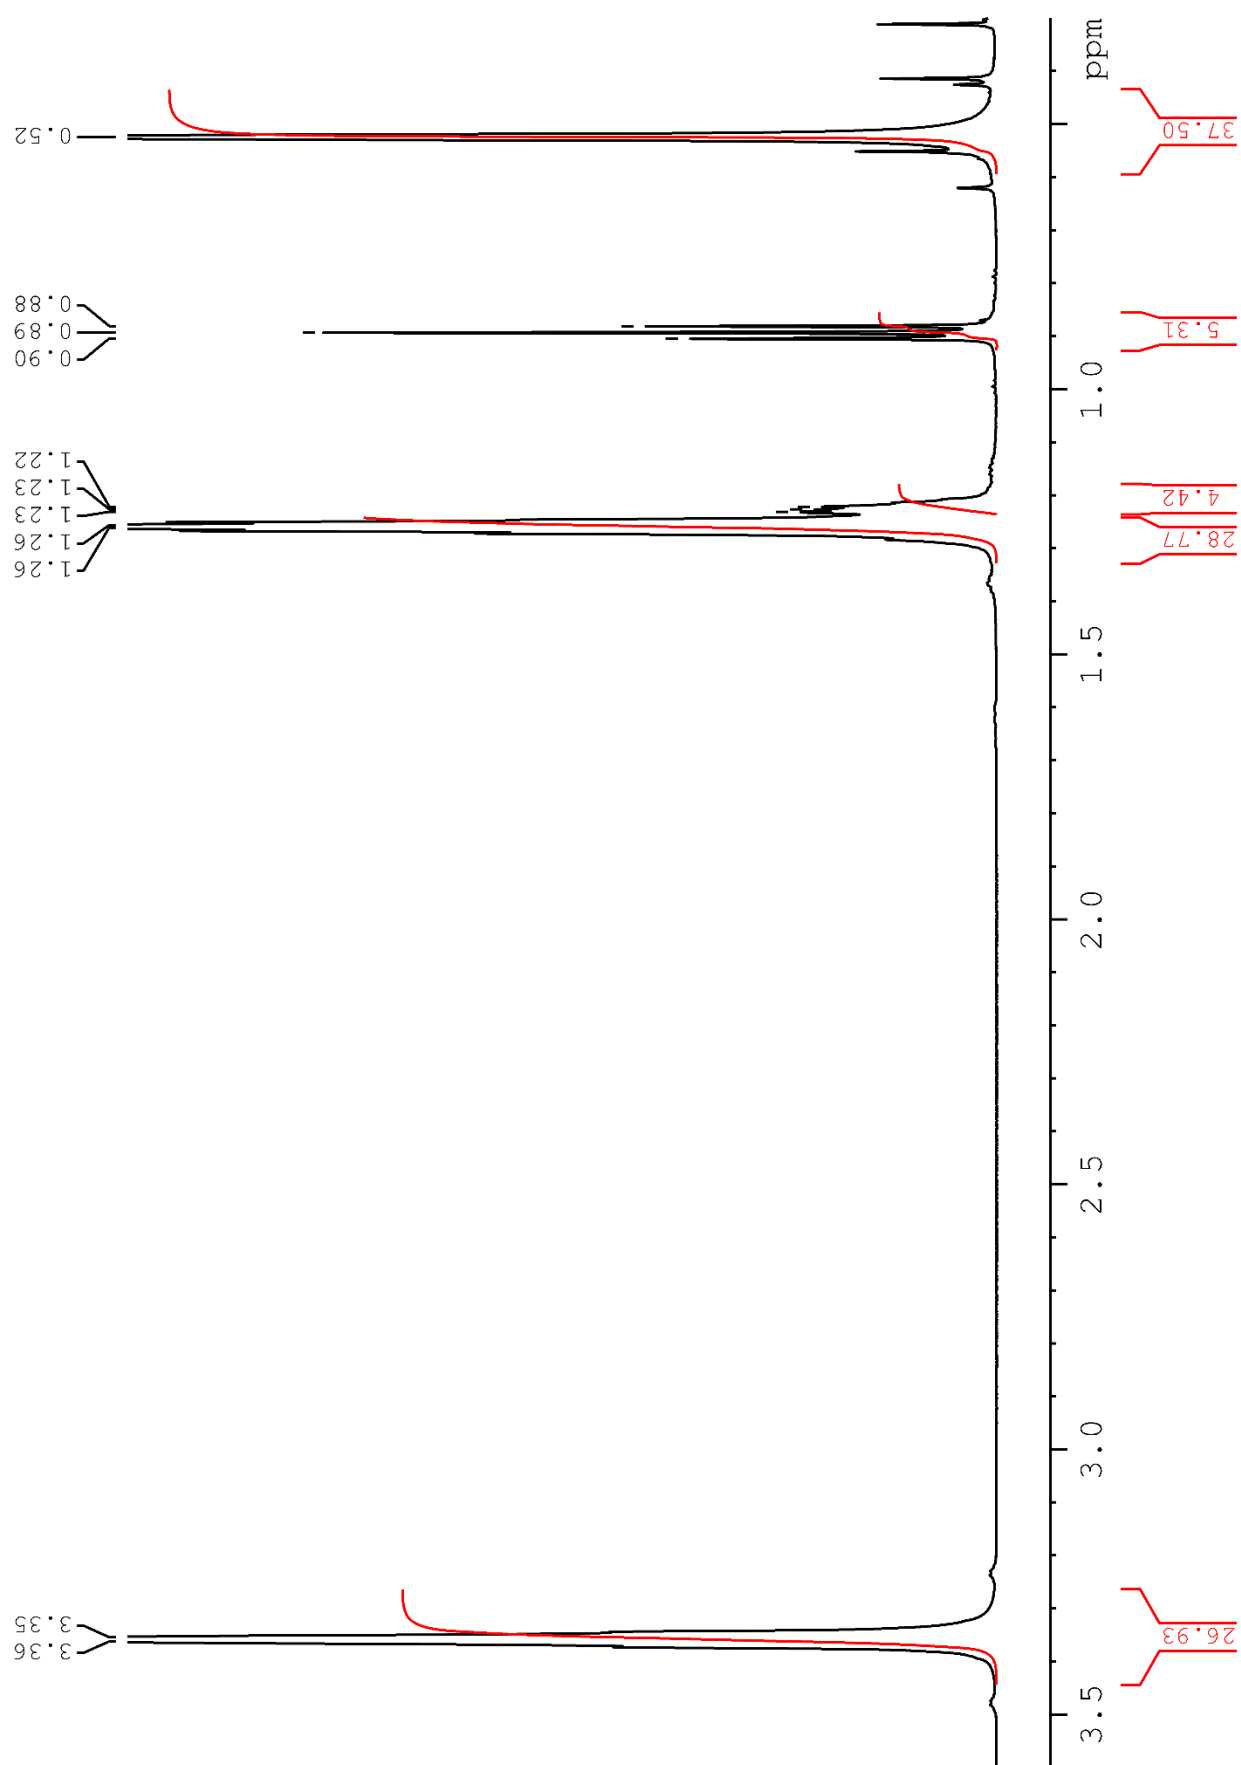

**Figure S19.** <sup>1</sup>H NMR spectrum of **1**·C<sub>6</sub>H<sub>14</sub> in C<sub>6</sub>D<sub>6</sub> (600.13 MHz) at 283 K (expanded region).

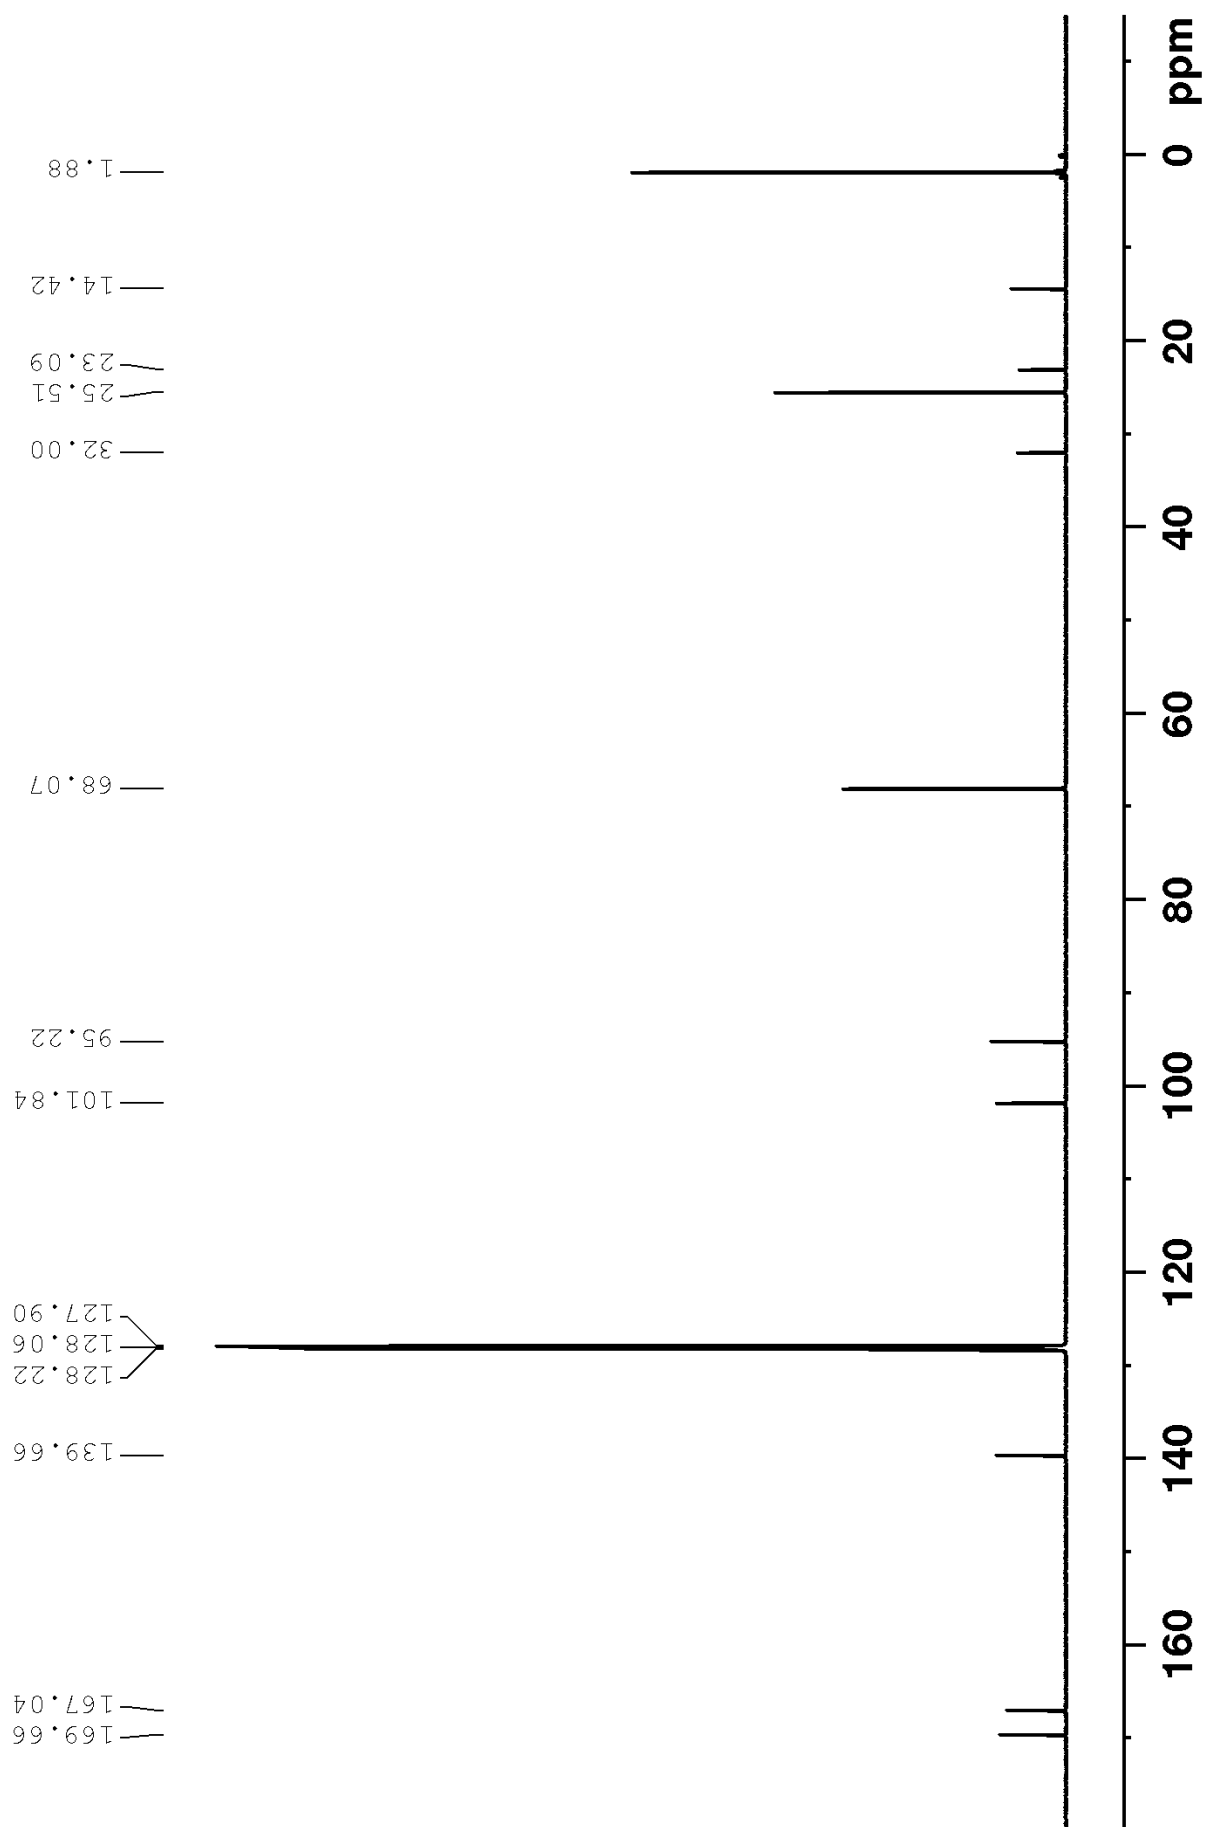

**Figure S20.** <sup>13</sup>C NMR spectrum of **1**-C<sub>6</sub>H<sub>14</sub> in C<sub>6</sub>D<sub>6</sub> (150.90 MHz) at 283 K.

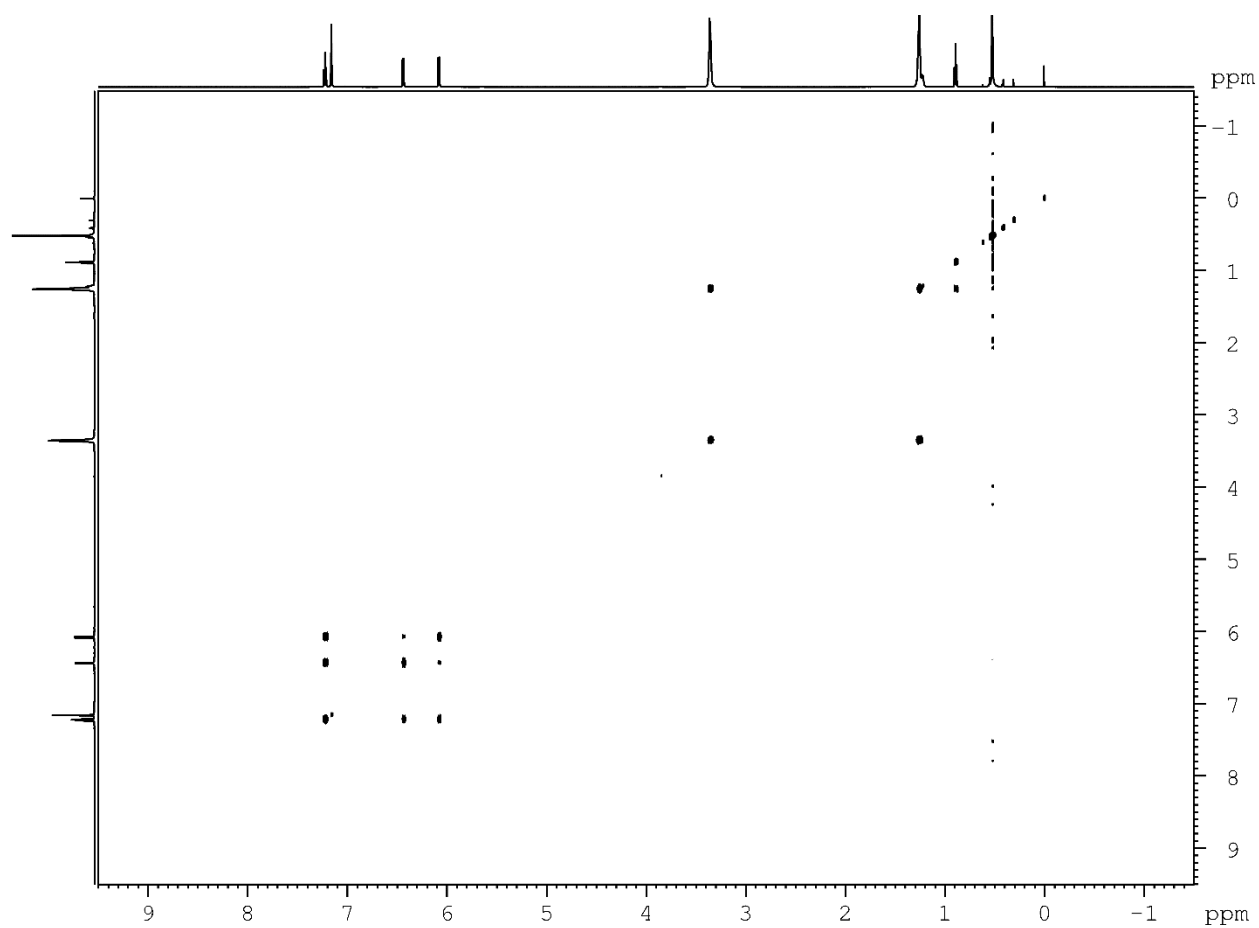

**Figure S21.**  $^1\text{H}$ - $^1\text{H}$  COSY spectrum of **1**· $\text{C}_6\text{H}_{14}$  in  $\text{C}_6\text{D}_6$  at 283 K.

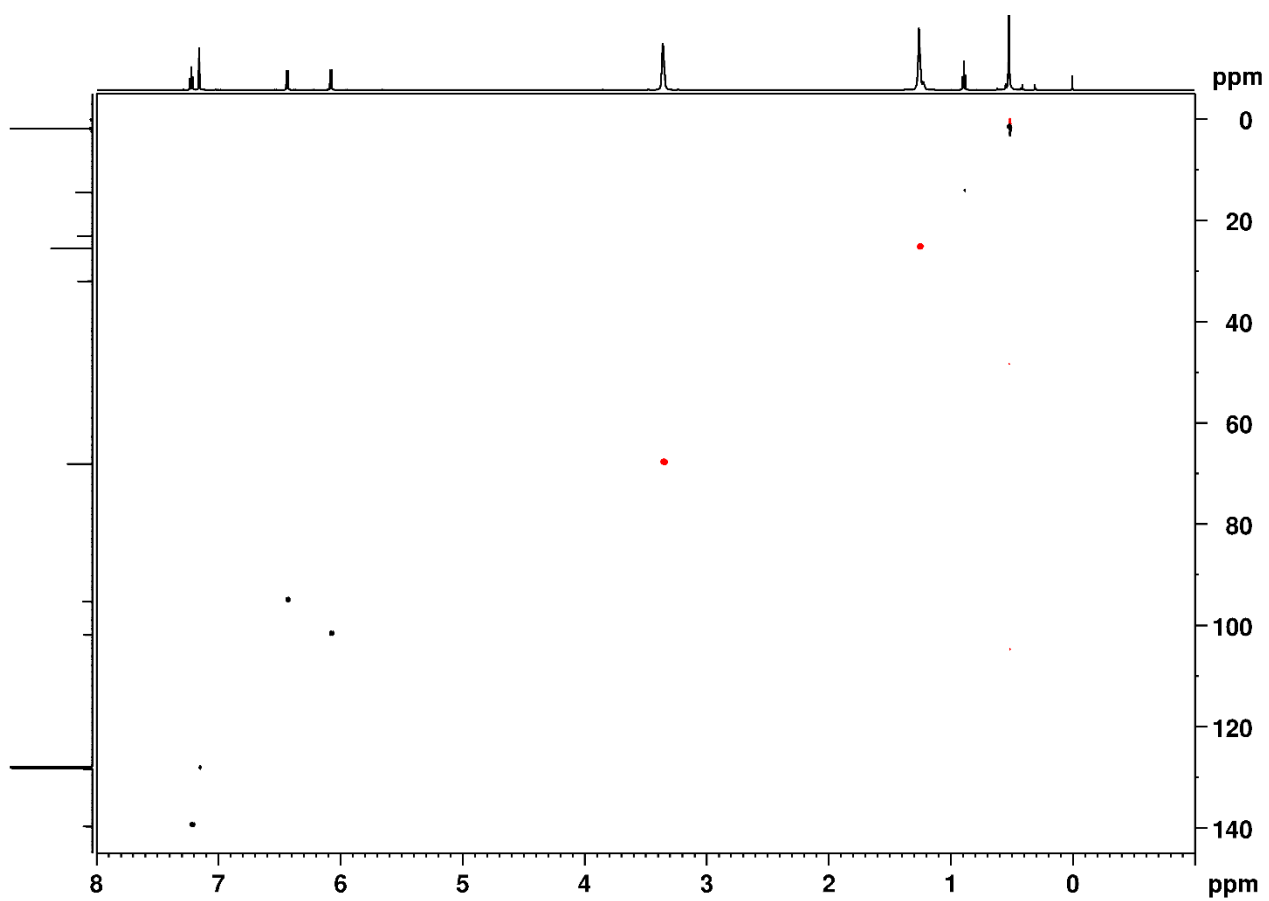

**Figure S22.**  $^1\text{H}$ - $^{13}\text{C}$  HSQCed spectrum of **1**· $\text{C}_6\text{H}_{14}$  in  $\text{C}_6\text{D}_6$  at 283 K.

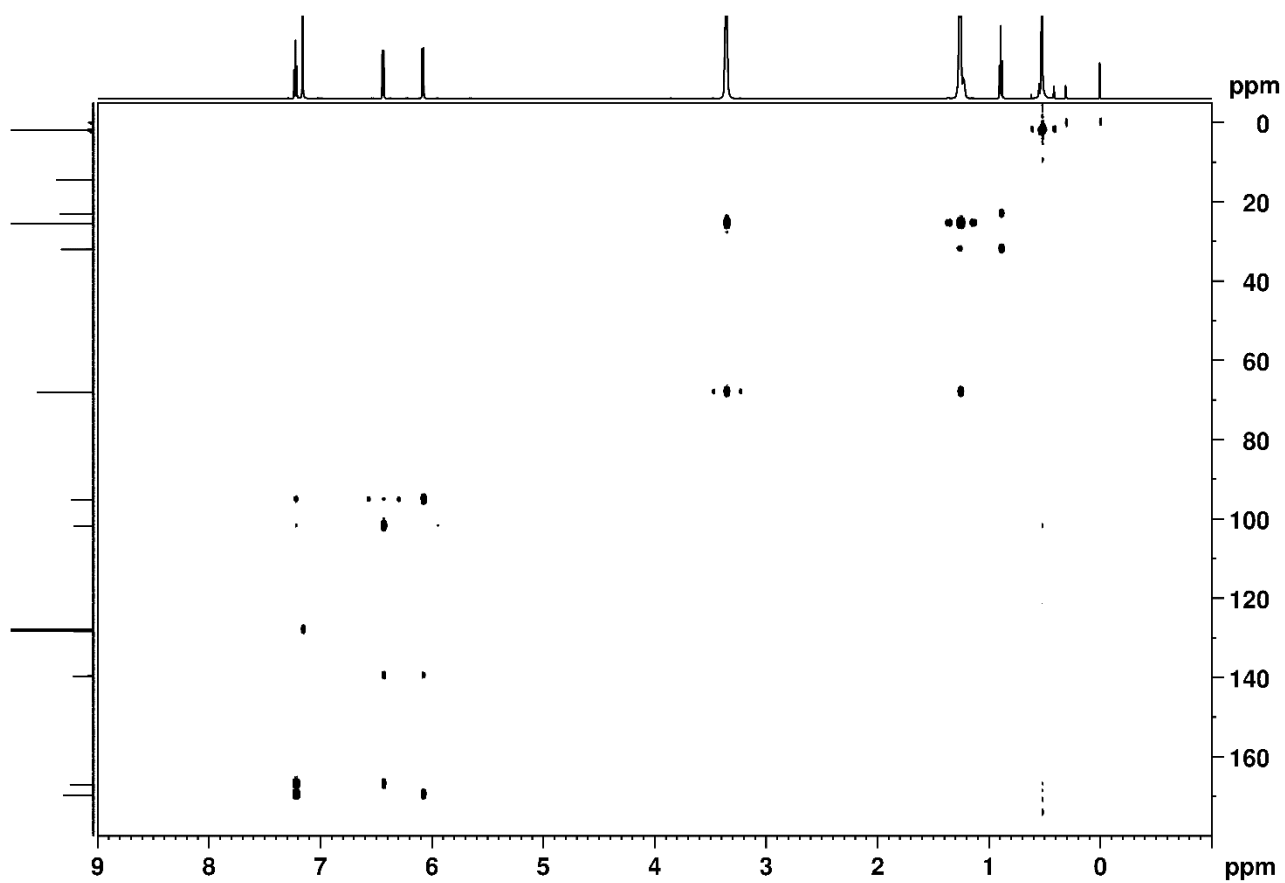

**Figure S23.**  $^1\text{H}$ - $^{13}\text{C}$  HMBC spectrum of **1**-C<sub>6</sub>H<sub>14</sub> in C<sub>6</sub>D<sub>6</sub> at 283 K.

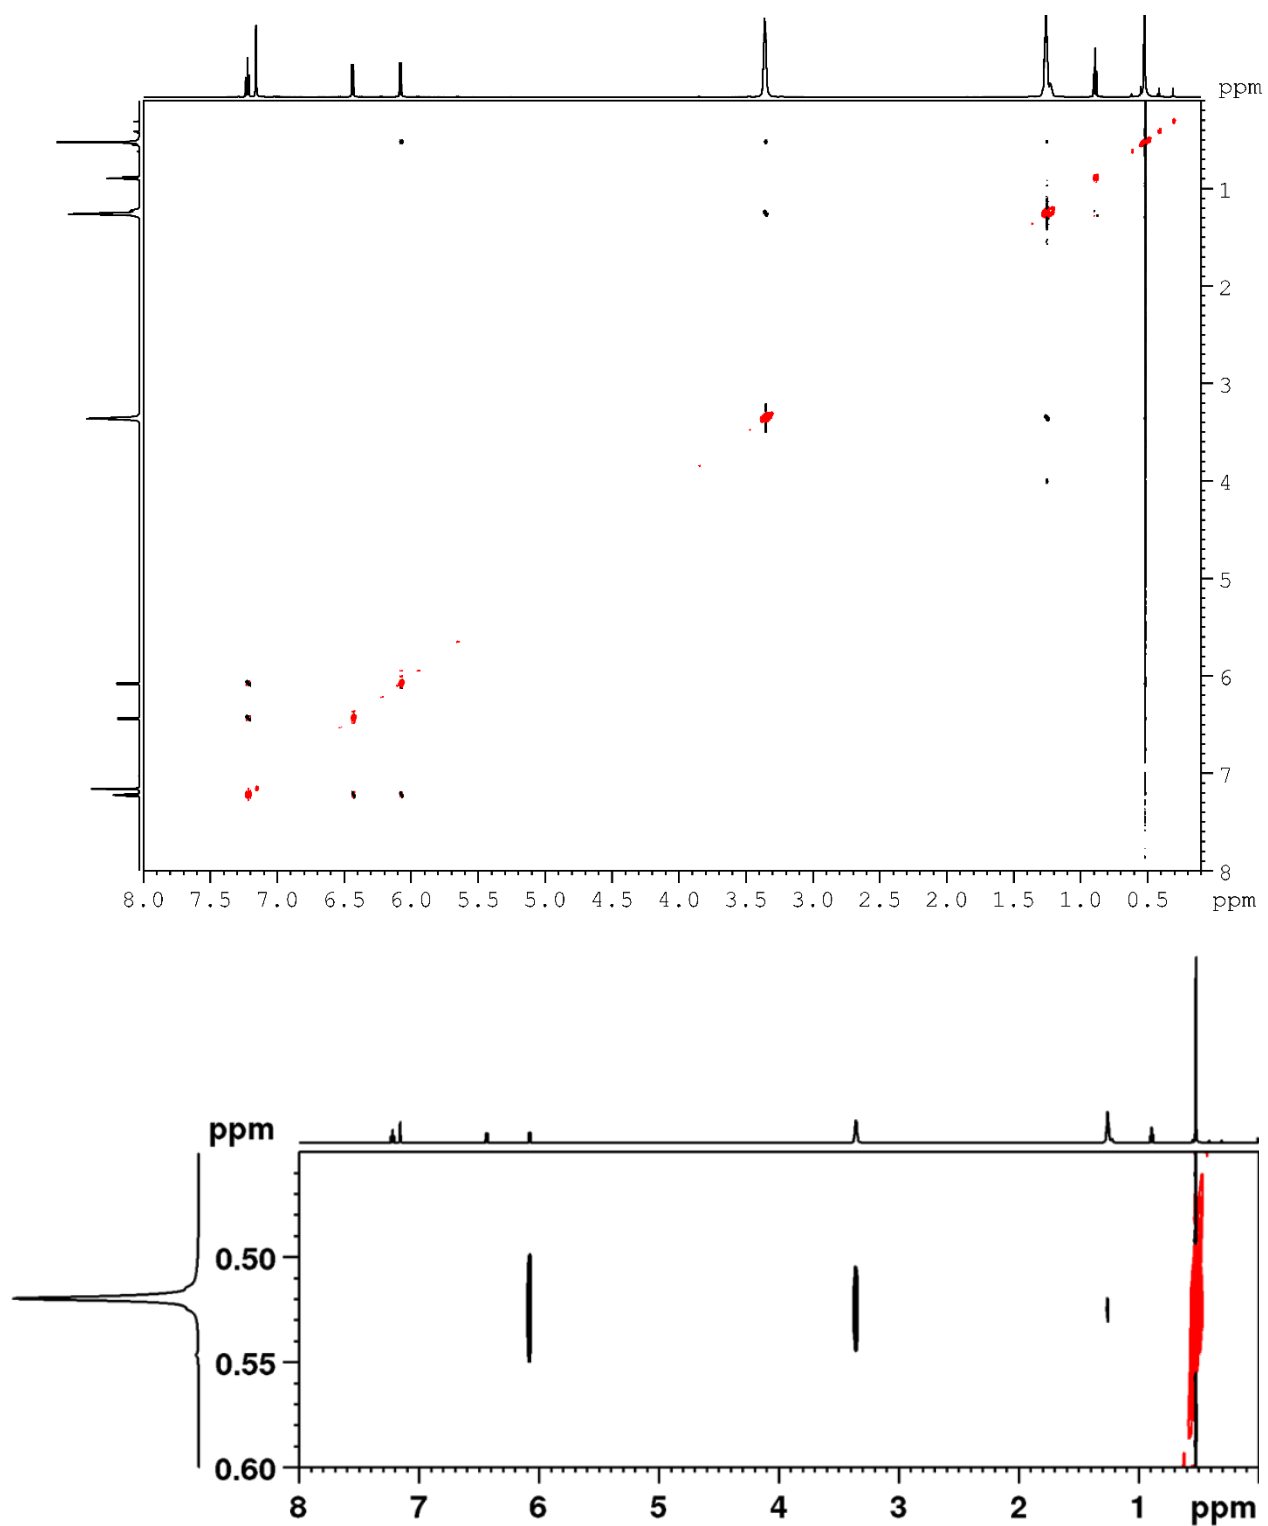

**Figure S24.**  $^1\text{H}$ - $^1\text{H}$  ROESY spectrum of **1**· $\text{C}_6\text{H}_{14}$  in  $\text{C}_6\text{D}_6$  at 283 K. The lower panel shows the cross peaks of  $(\text{CH}_3)_3\text{Si}$  with  $\text{H}^5$ ,  $\text{CH}_2\text{O}_{\text{thf}}$ , and  $\text{CH}_2\text{CH}_2\text{O}_{\text{thf}}$ .

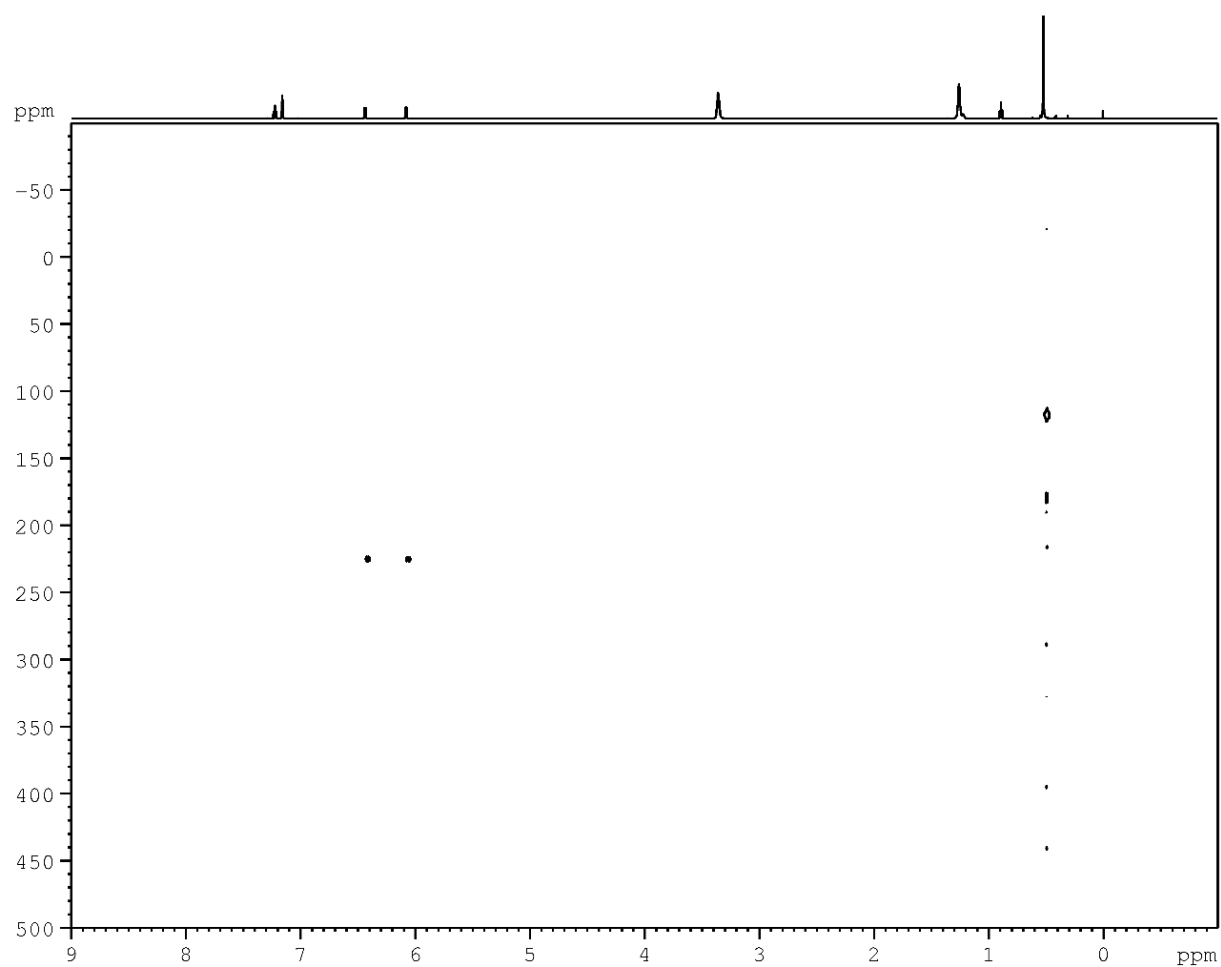

**Figure S25.**  $^1\text{H}$ - $^{15}\text{N}$  HMBC spectrum of  $1\cdot\text{C}_6\text{H}_{14}$  in  $\text{C}_6\text{D}_6$  at 283 K.

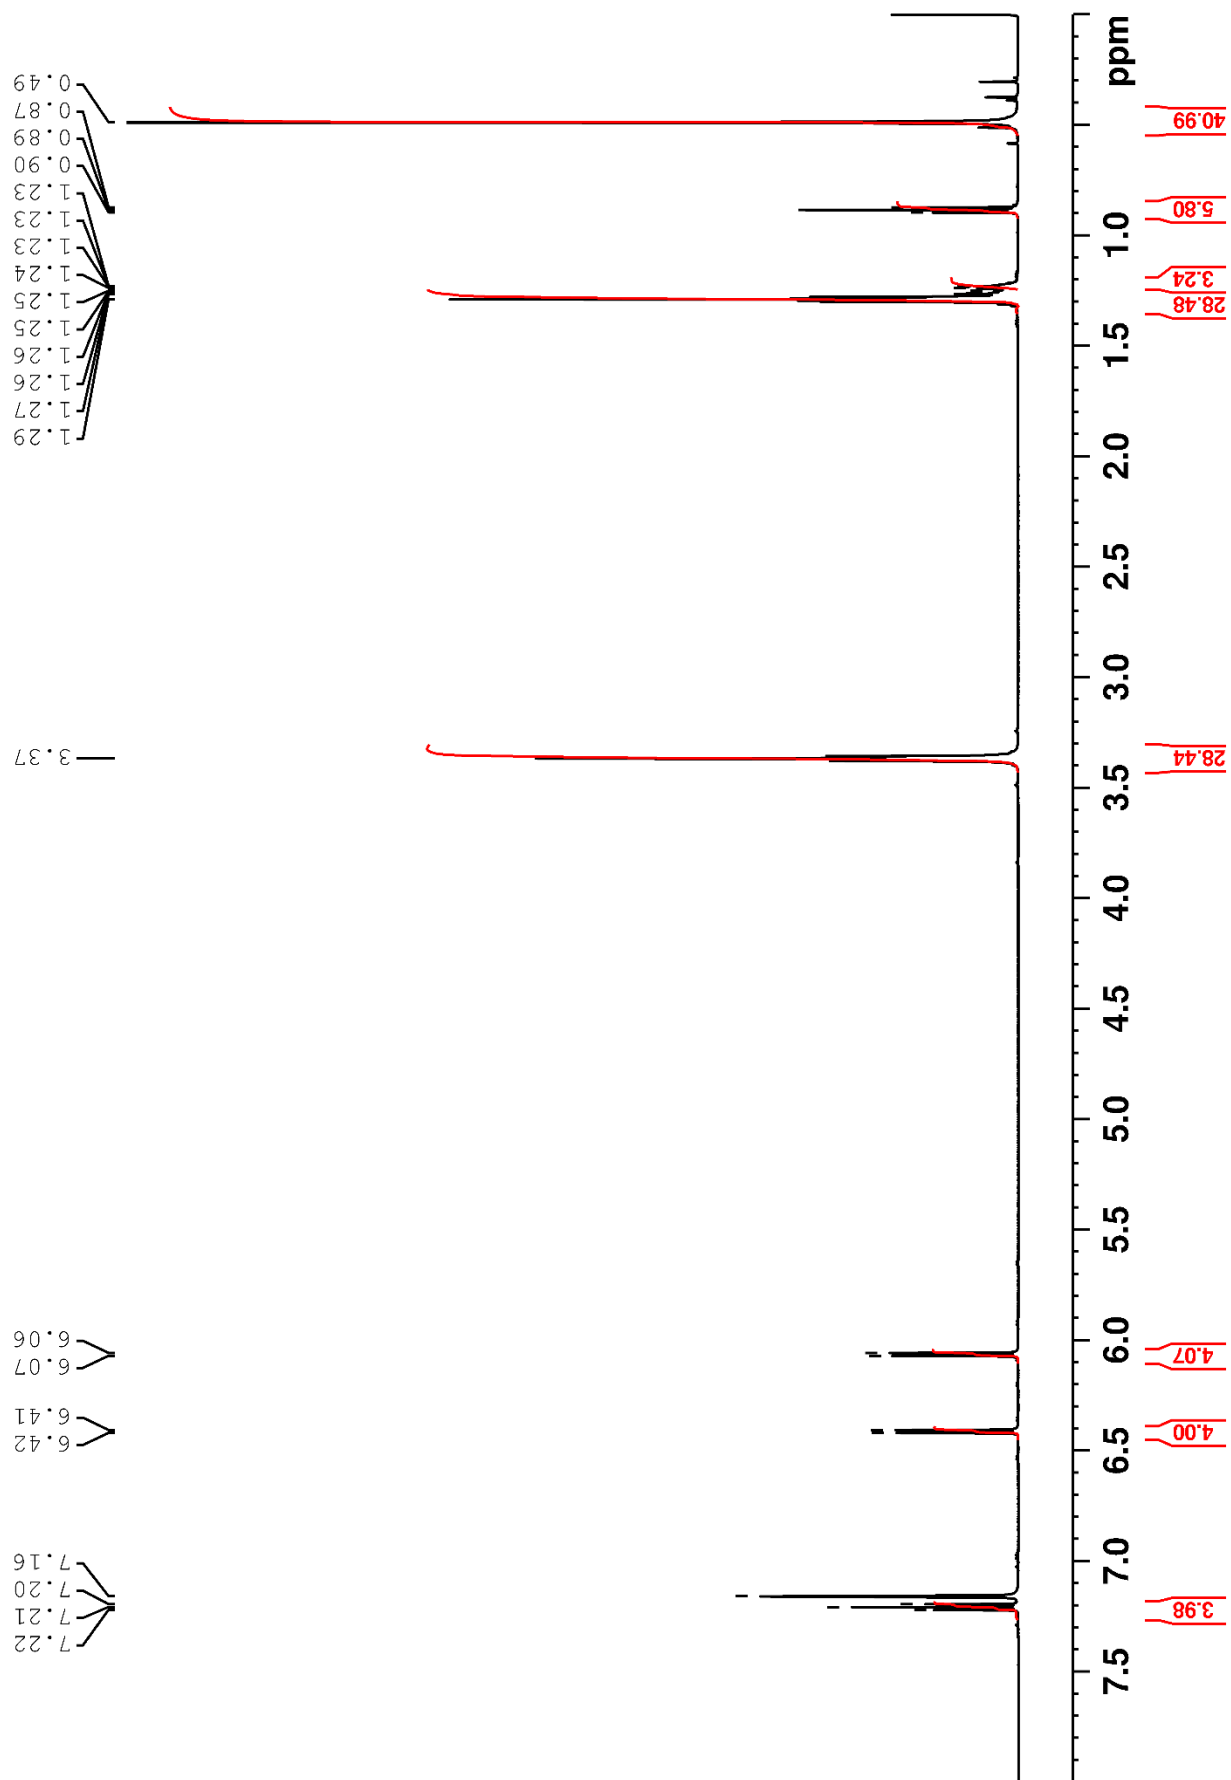

**Figure S26.**  $^1\text{H}$  NMR spectrum of **1**-C<sub>6</sub>H<sub>14</sub> in C<sub>6</sub>D<sub>6</sub> (600.13 MHz) at 310 K.

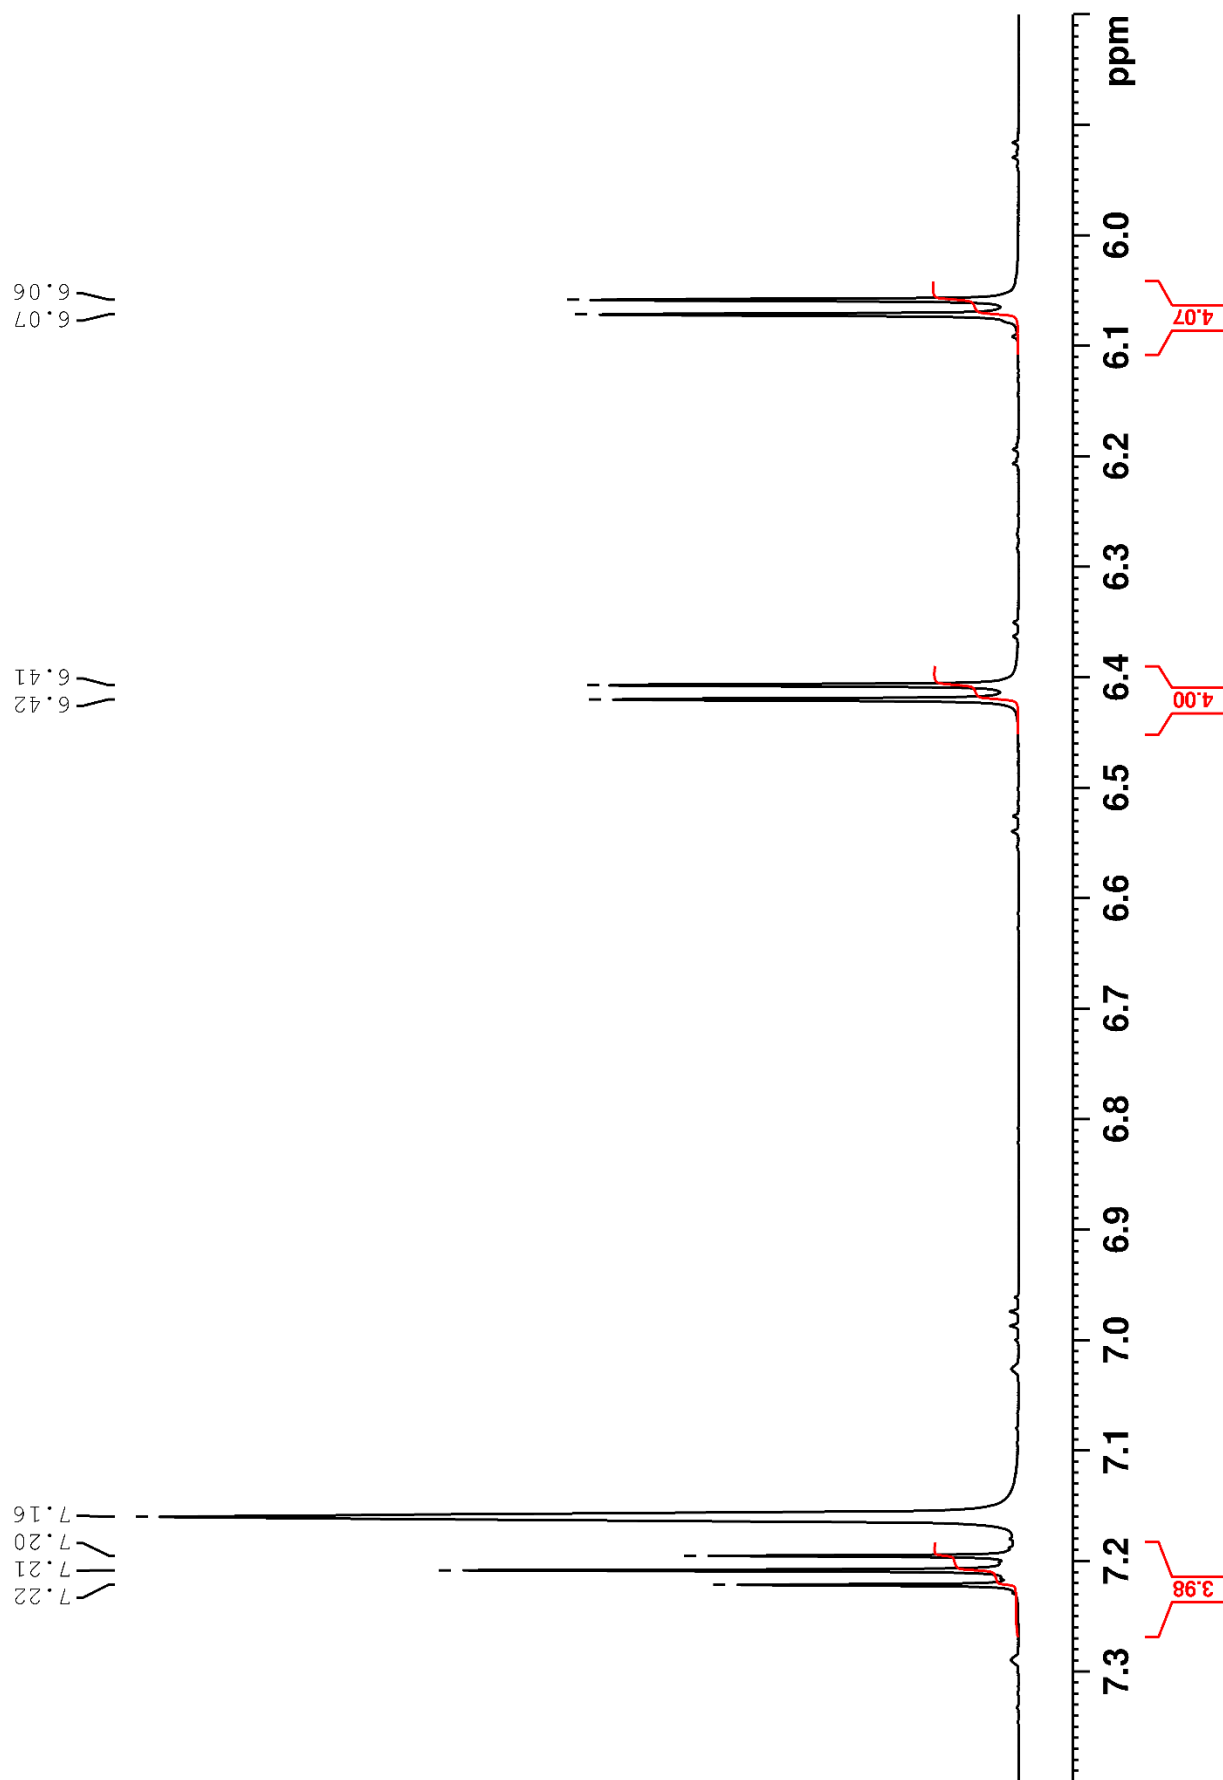

**Figure S27.**  $^1\text{H}$  NMR spectrum of **1**· $\text{C}_6\text{H}_{14}$  in  $\text{C}_6\text{D}_6$  (600.13 MHz) at 310 K (expanded region).

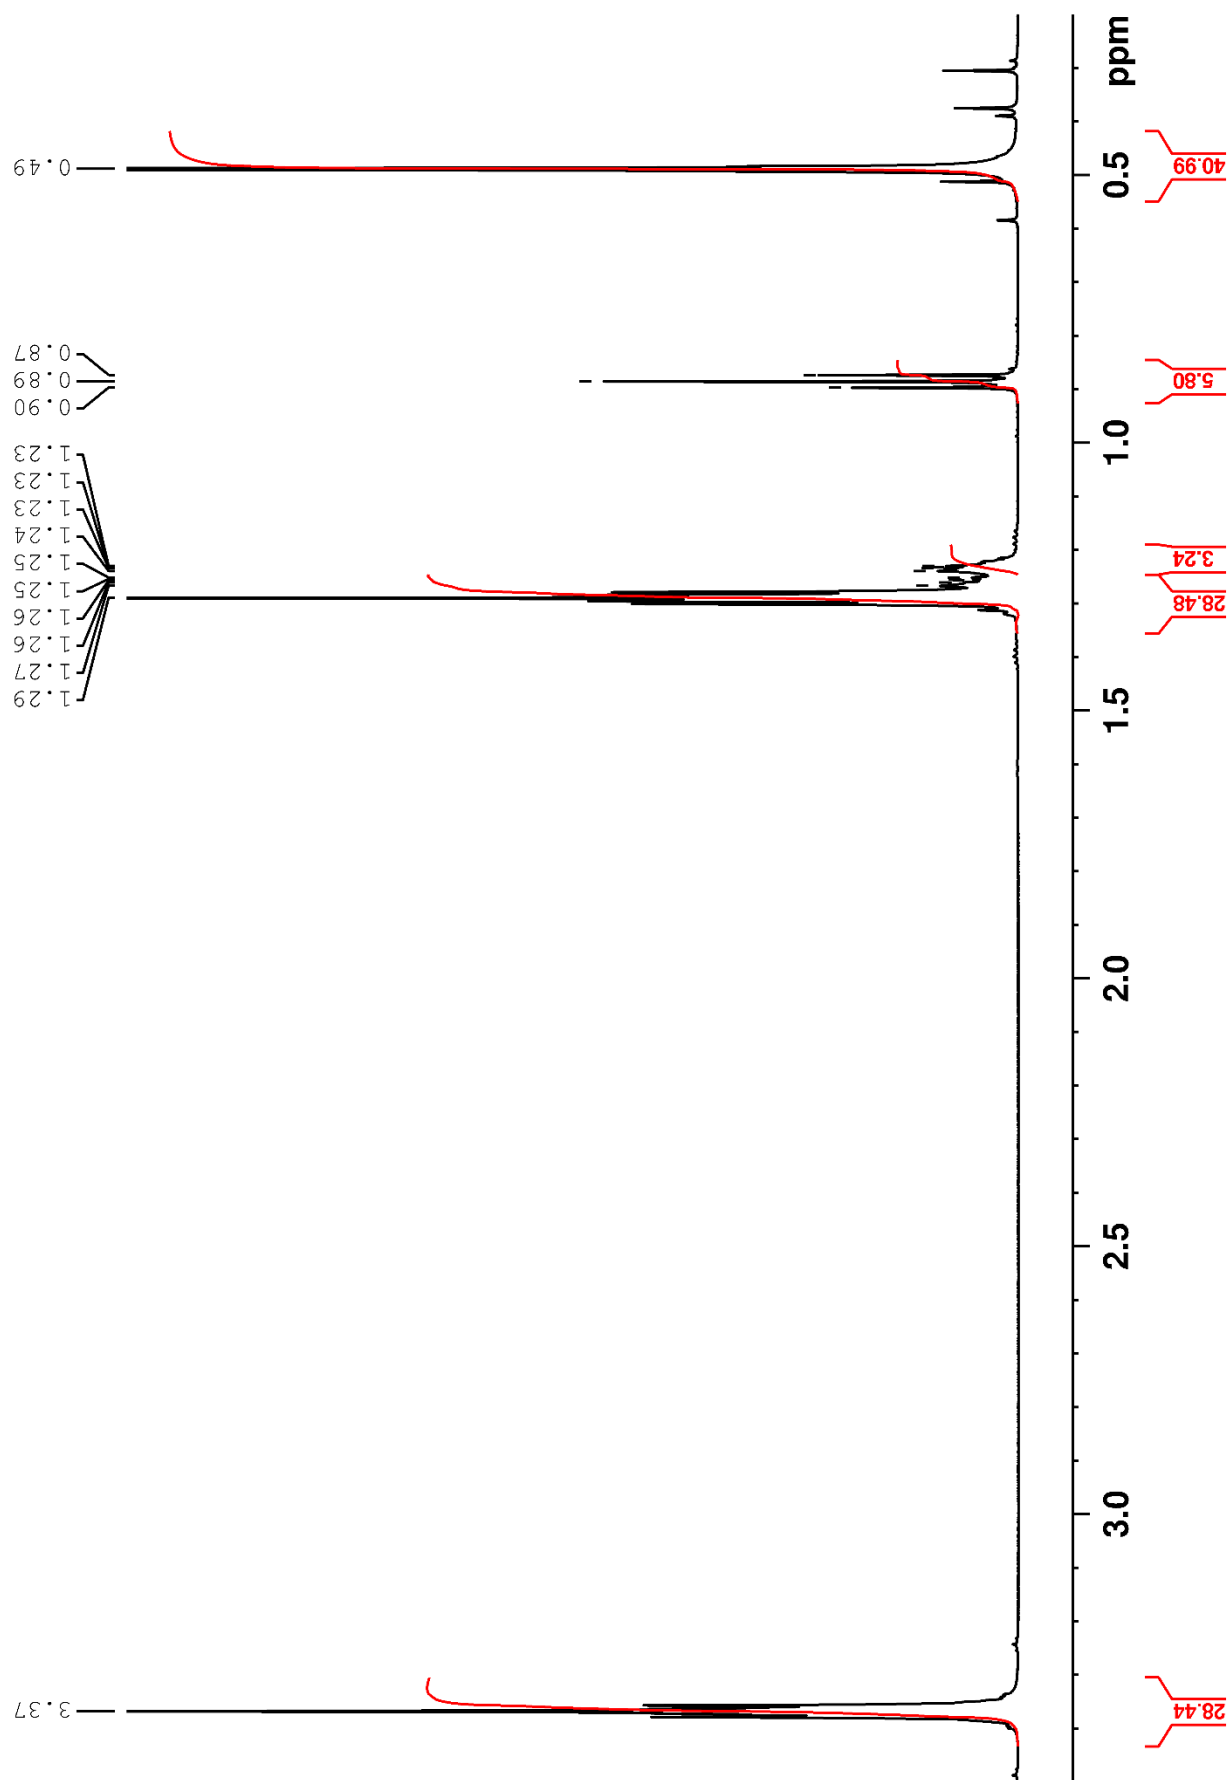

**Figure S28.** <sup>1</sup>H NMR spectrum of **1**·C<sub>6</sub>H<sub>14</sub> in C<sub>6</sub>D<sub>6</sub> (600.13 MHz) at 310 K (expanded region).

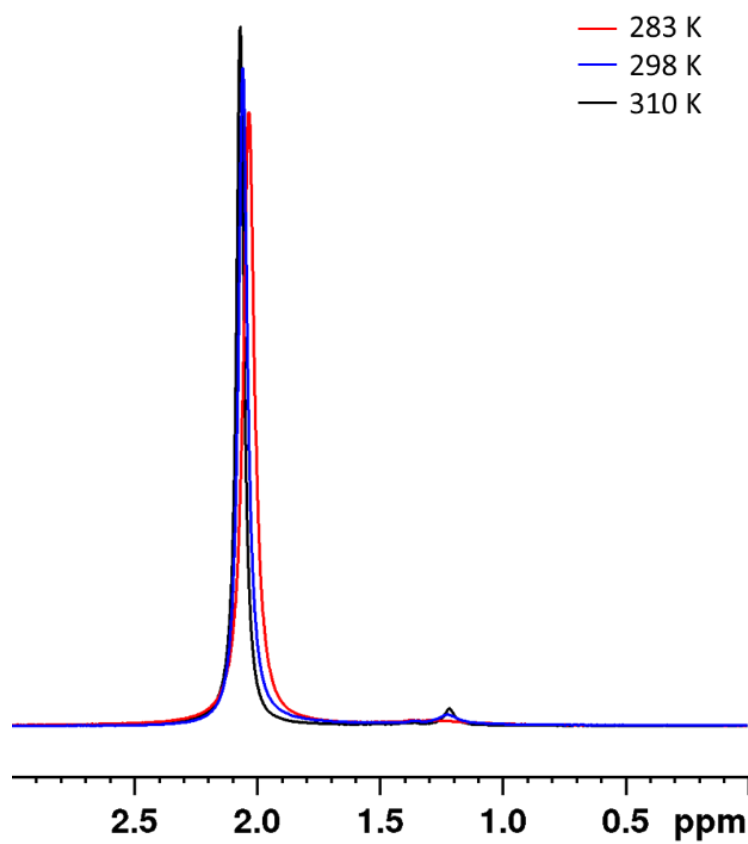

**Figure S29.**  $^7\text{Li}$  NMR spectrum of  $1\cdot\text{C}_6\text{H}_{14}$  in  $\text{C}_6\text{D}_6$  (233.23 MHz) at three different temperatures. Chemical shift values for majority (minority) signals are 2.03 (1.29) ppm at 283 K, 2.06 (1.22) ppm at 298 K, and 2.07 (1.22) ppm at 310 K.

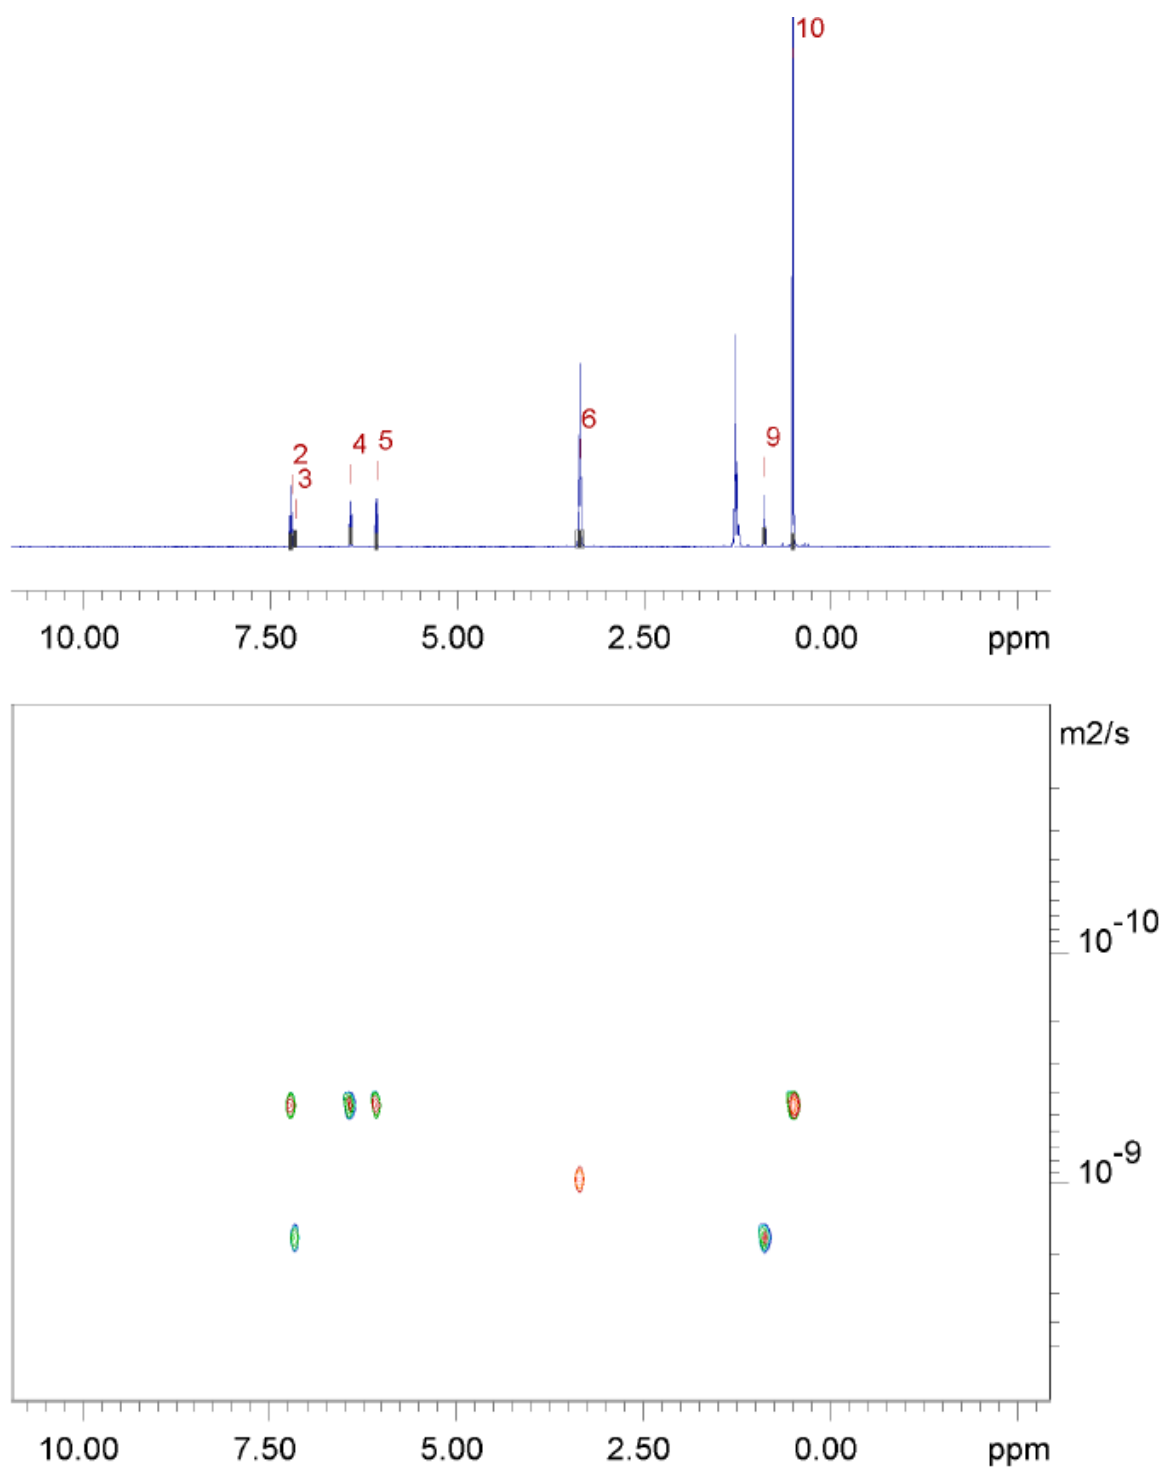

**Figure S30.**  $^1\text{H}$  DOSY spectrum of **1** in  $\text{C}_6\text{D}_6$  (400.13 MHz) at 298 K. The  $\text{CH}_2\text{CH}_2\text{O}$  signal of thf was not fitted as it extensively overlaps with peaks from *n*-hexane.

**Table S1.** Crystal data and refinement parameters for  $\beta$ -H<sub>5</sub>A, **1**·C<sub>6</sub>H<sub>14</sub>, and **2**.

| Compound                                             | $\beta$ -H <sub>5</sub> A                      | <b>1</b> ·C <sub>6</sub> H <sub>14</sub>                                                        | <b>2</b>                                                                                       |
|------------------------------------------------------|------------------------------------------------|-------------------------------------------------------------------------------------------------|------------------------------------------------------------------------------------------------|
| Formula                                              | C <sub>10</sub> H <sub>11</sub> N <sub>5</sub> | C <sub>62</sub> H <sub>110</sub> Li <sub>6</sub> N <sub>10</sub> O <sub>6</sub> Si <sub>4</sub> | C <sub>48</sub> H <sub>80</sub> Li <sub>6</sub> N <sub>10</sub> O <sub>4</sub> Si <sub>4</sub> |
| Molar mass (g mol <sup>-1</sup> )                    | 201.24                                         | 1245.59                                                                                         | 1015.22                                                                                        |
| <i>T</i> (K)                                         | 298(2)                                         | 115(2)                                                                                          | 115(2)                                                                                         |
| Crystal system                                       | monoclinic                                     | orthorhombic                                                                                    | triclinic                                                                                      |
| Space group                                          | <i>Cc</i>                                      | <i>Pbcn</i>                                                                                     | <i>P</i> $\bar{1}$                                                                             |
| <i>a</i> (Å)                                         | 22.7654(8)                                     | 17.5998(6)                                                                                      | 13.9508(10)                                                                                    |
| <i>b</i> (Å)                                         | 5.1397(2)                                      | 22.9506(7)                                                                                      | 19.1445(14)                                                                                    |
| <i>c</i> (Å)                                         | 16.9153(7)                                     | 18.4039(6)                                                                                      | 23.3537(14)                                                                                    |
| $\alpha$ (°)                                         | 90.000                                         | 90                                                                                              | 74.091(2)                                                                                      |
| $\beta$ (°)                                          | 104.211(2)                                     | 90                                                                                              | 74.507(2)                                                                                      |
| $\gamma$ (°)                                         | 90.000                                         | 90                                                                                              | 84.158(3)                                                                                      |
| <i>V</i> (Å <sup>3</sup> )                           | 1918.65(13)                                    | 7433.8(4)                                                                                       | 5777.7(7)                                                                                      |
| <i>Z</i>                                             | 8                                              | 4                                                                                               | 4                                                                                              |
| $\rho_{\text{calcd}}$ (g cm <sup>-3</sup> )          | 1.393                                          | 1.113                                                                                           | 1.167                                                                                          |
| $\mu$ (mm <sup>-1</sup> )                            | 0.092                                          | 0.131                                                                                           | 0.151                                                                                          |
| Crystal size (mm <sup>3</sup> )                      | 0.62×0.078×0.034                               | 0.55×0.22×0.18                                                                                  | 0.31×0.20×0.08                                                                                 |
| $\theta_{\text{max}}$ (°)                            | 27.510                                         | 28.633                                                                                          | 26.062                                                                                         |
| Number of reflections collected                      | 10058                                          | 68236                                                                                           | 95811                                                                                          |
| Number of independent reflections                    | 3988                                           | 9434                                                                                            | 22537                                                                                          |
| <i>R</i> <sub>int</sub>                              | 0.0255                                         | 0.0390                                                                                          | 0.0525                                                                                         |
| Parameters/constraints                               | 303/2                                          | 463/88                                                                                          | 1371/144                                                                                       |
| <i>R</i> 1, <i>wR</i> 2                              | 0.0580, 0.0823                                 | 0.0705, 0.1473                                                                                  | 0.0914, 0.1227                                                                                 |
| <i>R</i> 1, <i>wR</i> 2 [ <i>I</i> > 2σ( <i>I</i> )] | 0.0369, 0.0746                                 | 0.0466, 0.1333                                                                                  | 0.0449, 0.1055                                                                                 |
| GOF                                                  | 1.014                                          | 1.067                                                                                           | 1.052                                                                                          |
| Residues max/min (eÅ <sup>-3</sup> )                 | 0.121/−0.184                                   | 0.497/−0.483                                                                                    | 0.490/−0.342                                                                                   |
| Radiation used (Å)                                   | 0.71073 (Mo-Kα)                                | 0.71073 (Mo-Kα)                                                                                 | 0.71073 (Mo-Kα)                                                                                |

**Table S2.** Assignment of  $^1\text{H}$  and  $^{13}\text{C}$  NMR signals for  $1\cdot\text{C}_6\text{H}_{14}$  in  $\text{C}_6\text{D}_6$  at 283 K.

| $\delta_{\text{H}}$ (ppm) | multiplicity | integrated intensity | $^3J_{\text{H-H}}$ (Hz) | $\delta_{\text{C}}$ (ppm) | Assignment                                                                                                  |
|---------------------------|--------------|----------------------|-------------------------|---------------------------|-------------------------------------------------------------------------------------------------------------|
| <b>7.22</b>               | t            | 4H                   | 7.9                     | <b>139.66</b>             | $\text{H}^4/\text{C}^4$                                                                                     |
| <b>6.44</b>               | d            | 4H                   | 7.8                     | <b>95.22</b>              | $\text{H}^3/\text{C}^3$                                                                                     |
| <b>6.08</b>               | d            | 4H                   | 7.9                     | <b>101.84</b>             | $\text{H}^5/\text{C}^5$                                                                                     |
| <b>0.52</b>               | s            | 36H                  | /                       | <b>1.88</b>               | $(\text{CH}_3)_3\text{Si}$<br>$^1J_{\text{C-Si}} = 54.3 \text{ Hz}$<br>$^2J_{\text{H-Si}} = 6.2 \text{ Hz}$ |
| /                         | /            | /                    | /                       | <b>167.04</b>             | $\text{C}^2$                                                                                                |
| /                         | /            | /                    | /                       | <b>169.66</b>             | $\text{C}^6$                                                                                                |
| <b>1.25</b>               | m            | 24H                  | /                       | <b>25.51</b>              | $\text{CH}_2\text{CH}_2\text{O}_{\text{thf}}$                                                               |
| <b>3.36</b>               | m            | 24H                  | /                       | <b>68.07</b>              | $\text{CH}_2\text{O}_{\text{thf}}$                                                                          |
| <b>0.89</b>               | t            | 6H                   | /                       | <b>14.42</b>              | $\text{CH}_3_{n\text{-hexane}}$                                                                             |
| <b>1.26</b>               | m            | 4H                   | /                       | <b>23.09</b>              | $\text{CH}_2\text{CH}_3_{n\text{-hexane}}$                                                                  |
| <b>1.22</b>               | m            | 4H                   | /                       | <b>32.00</b>              | $\text{CH}_2\text{CH}_2\text{CH}_3_{n\text{-hexane}}$                                                       |

**Table S3.** Impurity NMR signals for  $1\cdot\text{C}_6\text{H}_{14}$  in  $\text{C}_6\text{D}_6$  at 283 K.<sup>a</sup>

| $\delta_{\text{H}}$ (ppm) | multiplicity | integrated intensity | $^3J_{\text{H-H}}$ (Hz) | $\delta_{\text{C/N}}$ (ppm) <sup>b</sup> | Assignment                 | ROE correlations  |
|---------------------------|--------------|----------------------|-------------------------|------------------------------------------|----------------------------|-------------------|
| <b>7.18</b>               | t            | 1H                   | 8.0                     | <sup>c</sup>                             | $\gamma\text{-H}$          |                   |
| <b>7.00</b>               | t            | 1H                   | 7.8                     | 139.8                                    | $\gamma'\text{-H}$         |                   |
| <b>6.99</b>               | t            | 1H                   | 8.0                     | 140.0                                    | $\gamma''\text{-H}$        |                   |
| <b>6.53</b>               | d            | 1H                   | 8.2                     | 99.8                                     | $\beta''\text{a-H}$        | 3.36              |
| <b>6.37</b>               | d            | 1H                   | 7.6                     | 93.6                                     | $\beta\text{a-H}$          | 3.36              |
| <b>6.22</b>               | d            | 1H                   | 7.8                     | 96.7                                     | $\beta'\text{a-H}$         | 0.41 (weak)       |
| <b>6.10</b>               | d            | 1H                   | 8.1                     | 104.2                                    | $\beta\text{b-H}$          | 0.55              |
| <b>5.95</b>               | d            | 1H                   | 8.0                     | 104.6                                    | $\beta'\text{b-H}$         | 0.41              |
| <b>5.65</b>               | d            | 1H                   | 7.8                     | 95.0                                     | $\beta''\text{b-H}$        | 0.31              |
| <b>3.84</b>               | s            | 1H                   | /                       | 79                                       | NH                         | 0.31, 0.55 (weak) |
| <b>0.55</b>               | s            | 9H                   | /                       | 2.5                                      | $(\text{CH}_3)_3\text{Si}$ |                   |
| <b>0.41</b>               | s            | 9H                   | /                       | 1.9                                      | $(\text{CH}_3)_3\text{Si}$ |                   |
| <b>0.31</b>               | s            | 9H                   | /                       | 0.3                                      | $(\text{CH}_3)_3\text{Si}$ |                   |

<sup>a</sup> In addition to one NH resonance, three sets of pyridyl and  $(\text{CH}_3)_3\text{Si}$  signals are clearly distinguished; the fourth set is hidden by the  $^1\text{H}$  NMR peaks of **1**. <sup>b</sup>  $^{13}\text{C}$  and  $^{15}\text{N}$  chemical shifts are obtained from HSQC and HMBC experiments, respectively. <sup>c</sup> Hidden by the H,C correlations of **1**.
